# **The disproportionate effect of drift on a hypervariable master regulator of density**

Alexis Bénard <sup>1,\*</sup>, H  l  ne Henri <sup>1</sup>, Camille No  s <sup>1,2</sup>, Fabrice Vavre <sup>1</sup>, Natacha Kremer <sup>1,\*</sup>

<sup>1</sup> Universit   de Lyon, Universit   Lyon 1, CNRS, VetAgroSup, Laboratoire de Biom  trie et Biologie Evolutive, UMR 5558, F-69622 Villeurbanne, France.

<sup>2</sup> Laboratoire Cogitamus, France.

\* Corresponding author(s): [natacha.kremer@normalesup.org](mailto:natacha.kremer@normalesup.org), [alexis.benard@outlook.com](mailto:alexis.benard@outlook.com)

## **Abstract**

Symbiosis is a continuum of long-term interactions ranging from mutualism to parasitism, according to the balance between costs and benefits for the protagonists. The density of endosymbiont density is in both cases a key factor that determines both the transmission of symbiont and the host extended phenotype and is thus tightly regulated within hosts. However, the evolutionary and molecular mechanisms underlying bacterial density regulation are currently poorly understood. In this context, the symbiosis between the fruit fly and its intracellular bacteria *Wolbachia* (wMelPop strain) is particularly interesting to study. Although vertically-transmitted, the symbiont is pathogenic, and a positive correlation between virulence and wMelPop density is observed. In addition, the number of repeats of a bacterial genomic region -Octomom- varies between individuals, but most likely also within them, and is positively correlated to the *Wolbachia* density. Such genetic heterogeneity within the host could promote conflicts between partners by increasing within-host competition between symbiont genotypes through a process analogous to the tragedy of the common. To characterize the determinisms at play in the regulation of bacterial density, we first introgressed wMelPop in different genetic backgrounds of *D. melanogaster*. We found different density levels and Octomom copy numbers in each host lineage, suggesting a host influence on density regulation through Octomom copy number selection. To confirm this hypothesis, we performed new replicated introgressions on the two *Drosophila* populations that exhibited the most extreme density levels. However, we found no evidence of host influence on density regulation. Instead, we found instability in infection patterns across generations, which rather suggests an influence of drift. Moreover, using reciprocal crosses with the two extreme lineages, we confirmed the absence of host regulation on density levels and Octomom copy number, and a strong influence of drift. We then discuss how drift, both on the symbiont population during transmission and on the host population, could limit the efficiency of selection in such a symbiotic system, and the consequences of drift on the regulation of density and composition of bacterial populations.

**Keywords:** Symbiosis, *Wolbachia*, *Drosophila*, density regulation, drift

## 32 Introduction

33 A majority of organisms live in symbiosis, a close relationship between two organisms belonging to different species  
34 that ranges along the continuum between parasitism and mutualism (De Bary, 1879; Tipton, Darcy and Hynson,  
35 2019). The regulation of the symbiont population, and particularly their abundance within host tissues, are  
36 important characteristics that shape the tight relationship between partners and influence the position of the  
37 symbiosis along the mutualism-parasitism continuum (Tiivel, 1991; Douglas, 1994). Research on disease evolution  
38 has further shown that the evolution of virulence is balanced by the transmission of symbionts to new hosts, and  
39 that both virulence and transmission rely on the regulation of the symbiotic density (Anderson and May, 1982). On  
40 the one side, an increased virulence can benefit symbionts by increasing their instantaneous transmission, as they  
41 exploit more host resources and thus increase their replication within the host. On the other side, the more  
42 abundant the symbionts are in host tissues, the more they cost to the host, which shortens the host life span and  
43 thereby the window of transmission of the symbiont. As a result, the virulence/transmission trade-off leads to a  
44 symbiotic density optimum that optimizes symbiont transmission over the entire life of the host.

45 Symbiont density is thus under strong regulation (O'Neill, Hoffmann and Werren, 1997; Alizon *et al.*, 2009), and  
46 many factors can contribute to its control (López-Madrugal and Duarte, 2019). In insects for instance, host factors  
47 can play a major role in regulating the symbiont population (Poinso *et al.*, 1998; Douglas, 2014) through the  
48 activation of immune pathways, such as DUOX or Toll (Douglas, Bouvaine and Russell, 2011; You, Lee and Lee,  
49 2014). Symbionts can also be involved in their own regulation according to particular genetic factors (Ijichi *et al.*,  
50 2002; Chrostek *et al.*, 2013). This is for example the case in symbioses between wasps and vertically-transmitted  
51 bacteria, where densities of *Wolbachia* are strain-specific in co-infection (Mouton *et al.*, 2003, 2004). Still, some  
52 mechanisms involved in bacterial regulation are poorly understood in insects. For instance, the target of bacterial  
53 regulation remains to be clarified: does the host control the overall symbiont population by decreasing symbiont  
54 abundance regardless the symbiont genetic specificity or does it target specific variants? Also, control mechanisms  
55 that are independent of classical immune pathways are worth exploring. For instance, are cases where hosts  
56 sanction symbiont through differential allocation of metabolites frequent and widespread in symbiotic associations  
57 (Douglas, 2008)?

58 Many evidence suggest that selection should lead to symbiotic population regulation systems (Douglas, 2014), but  
59 two evolutionary mechanisms could limit the effectiveness of the selection on density regulation and should also  
60 be considered: conflicts between different levels of selection and drift. Regarding levels of selection, between-host  
61 selection predicts that any excessive replication would be detrimental to the fitness of the host, and therefore  
62 would select for symbiotic variants that are the least harmful while being well transmitted (Szathmáry and Smith,  
63 1995). On the contrary, competition that occurs within host tissues should favor symbiont variants that are the  
64 most efficient to colonize faster the host, so those with the most proliferative abilities regardless of the cost payed  
65 by the host (Alizon, de Roode and Michalakis, 2013). Hence, do within- and between-host selections create an  
66 evolutionary conflict regarding the control of symbiont density by favoring symbiont strains with opposite  
67 replication profiles (O'Neill, Hoffmann and Werren, 1997; Monnin *et al.*, 2020)? Finally, what is the importance of

68 drift in vertically-transmitted symbioses? Indeed, bottlenecks during transmission reduce the genetic diversity to  
69 the following host generation and may limit the effectiveness of selection upon symbiotic population regulation  
70 (Mathé-Hubert *et al.*, 2019). Such molecular and evolutionary mechanisms remain poorly studied, especially in  
71 vertically-transmitted symbioses, although they can play an important role in the epidemiological and evolutionary  
72 dynamics of symbiotic interactions. A first limitation is conceptual, as populations of vertically-transmitted  
73 endosymbionts tend to be considered with little or no heterogeneity, thus limiting the potential for within-host  
74 selection. However, while recurrent bottlenecks during transmission tend to reduce diversity, heterogeneity can  
75 still be observed in certain systems (Banks and Birky, 1985; Birky, Fuerst and Maruyama, 1989; Abbot and Moran,  
76 2002; Asnicar *et al.*, 2017). A second -more practical- limitation is that if heterogeneity does exist in symbiont  
77 populations, it is difficult to trace it experimentally, because of the absence of genetic markers.

78 A good study model to address questions related to density control is the maternally-transmitted bacterium  
79 *Wolbachia* in association with *Drosophila* hosts. In particular, the virulent wMelPop strain (Min and Benzer, 1997),  
80 which can exhibit heterogeneous density levels between individuals, has differential virulence profiles. Virulence is  
81 notably correlated to a tandem amplification of the genomic region “Octomom” (Chrostek *et al.*, 2013). Indeed,  
82 flies harboring more copies of Octomom exhibit high density levels in their tissues and a reduced lifespan, while  
83 those with less copies exhibit low density levels and survive longer (Chrostek and Teixeira, 2015). This model system  
84 is therefore advantageous because hosts and symbionts can exhibit genetic variability, and because the number of  
85 Octomom copies can be used as a marker to track the evolution of the symbiotic population. Moreover, Monnin *et*  
86 *al.* (2000) showed in a previous study that within-host selection can occur in the wMelPop in *Drosophila*  
87 *melanogaster*.

88 In this study, we take advantage from this *Drosophila*-wMelPop symbiosis to shed light on the evolutionary  
89 determinisms that act on the regulation of vertically-transmitted symbiont in insects. We investigate whether the  
90 host genetic background can directly influence the density of the symbionts, or whether the symbionts self-regulate  
91 their density *via* Octomom. Using different host genetic backgrounds and a combination of introgressions and  
92 crossing experiments, we analyze the respective role of host and symbiont backgrounds, but also drift, in the  
93 evolution of density and genetic composition of the symbiotic population.

## 94 **Materials and Methods**

### 95 **Model system**

96 *Drosophila melanogaster* flies have been trapped in different locations (Arabia, Bolivia, China (Canton), France  
97 (Sainte-Foy-lès-Lyon), Republic of the Congo - RC (Brazzaville), and USA (Seattle)). These populations have been  
98 maintained in the laboratory by regular sib mating for at least 10 years and are considered as genetically  
99 homogeneous. In the following experiments, we used these 6 inbred lines (*Wolbachia*-free) plus the w1118 line,  
100 infected either by the *Wolbachia* strain wMelPop (provided by Scott O’Neil (Monash University, Australia)) or by  
101 the strain wMelCS (provided by J. Martinez/F. Jiggins, Cambridge University, UK).

## 102 Rearing and collection

103 Flies were maintained under 12-hour day/night cycles at constant temperature and hygrometry (25°C and 60%  
104 relative humidity), and reared on rich medium (for 1 L of medium: 73.3 g of Gaude flour, 76.7 g of inactive brewer's  
105 yeast, 8.89 g of agar-agar powder, 4 g of Tegosept - Nipagine, 0.4 L of distilled water and 55.5 mL of 95% ethanol).  
106 For the sampling, we controlled the larval competition by depositing 100 *Drosophila* eggs on a rich medium pellet  
107 (1 mL) placed in a tube of agarose medium. After hatching, flies were transferred on an agarose medium  
108 supplemented with sugar (10 %) and were collected after 7 days to be frozen and stored at -20°C.

## 109 Wolbachia introgression within various host genetic backgrounds

110 As *Wolbachia* is a maternally-transmitted bacterial symbiont, introgression of the infection in a previously  
111 uninfected line relies on crosses of uninfected males from this line with females of a *Wolbachia*-infected line. The  
112 symbiotic introgression method allows to transmit symbionts from a donor line to a recipient line while conserving  
113 most of the genetic background of the recipient line. This method consists in making a first cross between  
114 *Wolbachia*-infected females (here, n = 20) from the donor line with *Wolbachia*-uninfected males (here, n = 10) from  
115 the recipient line. Then, the F1 progeny of this previous cross carries the *Wolbachia* symbionts from the donor line  
116 and shares half of its genetic background between the donor and the recipient lines. Two additional backcrosses  
117 between females from the F1 (and then F2) progeny and males of the recipient lines are necessary to restore at the  
118 F3 generation 87.5 % of the genetic background of the recipient line (Figure 1).

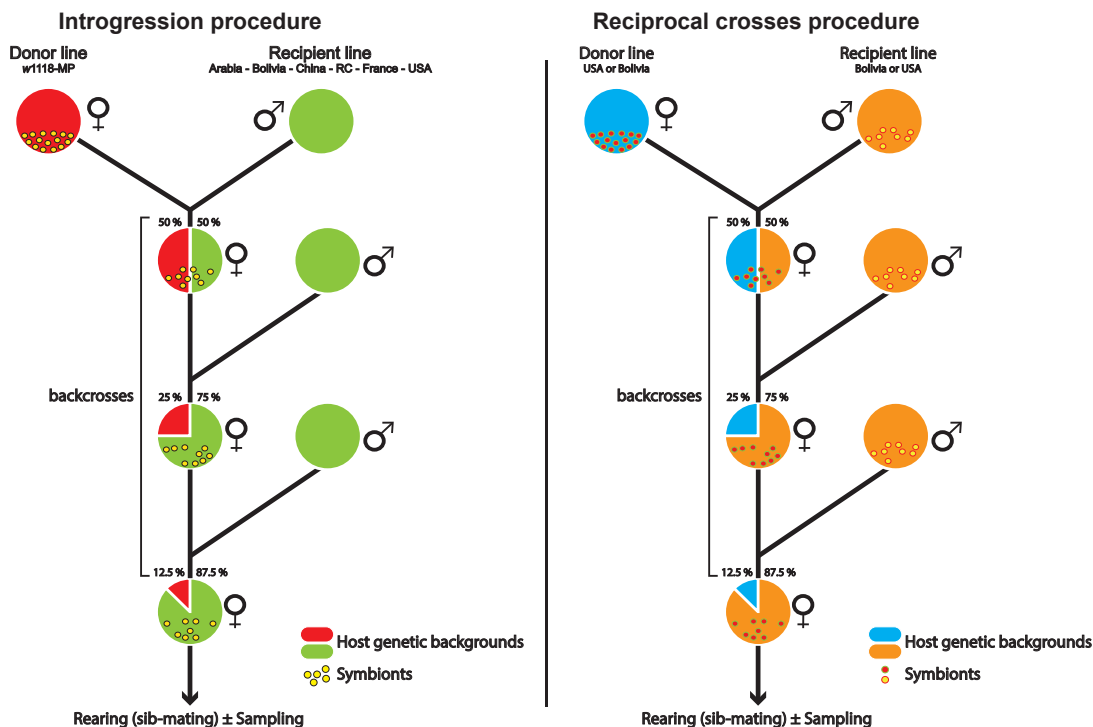

120  
121 **Figure 1: Introgression and reciprocal crosses procedures.**

122 Transmission of symbionts from females of the donor line (red or blue) to a recipient line (green or orange). Serial backcrosses  
123 were performed to restore the recipient host genetic background by mating daughters from the previous cross with males  
124 from the recipient line. This method was applied to infect the 6 natural *Drosophila melanogaster* populations (experiment #1),  
125 to perform new introgressions from Bolivia or USA on 3 replicates (experiment #2) and to conduct reciprocal crosses  
126 (experiment #3).

127 We first applied this method to infect the 6 natural *Drosophila melanogaster* population lines with the wMelPop  
128 strain (experiment #1, MP1 lines). For that purpose, we used an iso-female w1118 line infected with wMelPop  
129 (IsoA3) as the donor line and the other populations as recipient lines (1 introgression / line). Eight generations after  
130 the introgression procedure (under the same rearing conditions as explain above), each new generation was  
131 established by tube transfer of 80 randomly selected individuals. Infection patterns in these lines were checked by  
132 qPCR to measure wMelPop relative density and the average Octomom copy number per bacteria per fly. As the  
133 introgression of wMelPop in different recipient lines (experiment #1) resulted in different infection patterns (*i.e.*,  
134 density and number of Octomom copies), we tested in a second experiment the replicability of the infection pattern  
135 after a new introgression procedure. For that purpose, we selected two recipient lines (USA and Bolivia) that  
136 exhibited extreme infection patterns after introgression (*i.e.*, USA-MP1 exhibited a high wMelPop density whereas  
137 Bolivia-MP1 exhibited a low wMelPop density, see results), and performed anew 3 independent symbiotic  
138 introgressions, using the same iso-female line (IsoA3, 12 generations after the introgression procedure) as the  
139 donor line and these two populations (USA and Bolivia) as recipient lines. After 3 generations of backcrosses,  
140 Bolivia-MP2 and USA-MP2 flies were maintained under regular sib-mating.

141 We also independently performed reciprocal crosses between the Bolivia-MP1 and USA-MP1 lines (*i.e.*, lines  
142 infected with wMelPop during the first introgression experiment) to test the respective influence of the host and  
143 symbiotic genetic backgrounds on the wMelPop proliferation within flies. For this purpose, we reciprocally  
144 backcrossed Bolivia-MP1 and USA-MP1 individuals for 3 generations (Figure 1 right; 3 independent replicates). After  
145 3 backcrosses, flies were maintained under regular sib-mating.

#### 146 **Quantification of wMelPop density and Octomom copy number**

147 *Wolbachia* density and Octomom copy number were measured on 7-days old flies, whose DNA was extracted using  
148 the Biobasic EZ-10 96-well Plate Animal Genomic DNA kit. In brief, flies were individually crushed in 400  $\mu$ L of lysis  
149 buffer by a sterile 5-mm stainless bead shaken by a TissueLyser (Qiagen). DNA was extracted following the  
150 instructions from the manufacturer, eluted in 100  $\mu$ L of elution buffer and stored at -20°C.

151 Relative *Wolbachia* density and Octomom copy number were measured in the same extract by quantitative real-  
152 time PCR using SYBR® green and following the MIQE guideline applied to DNA samples (Bustin *et al.*, 2009). To  
153 quantify the average amount of wMelPop per fly, we used primers targeting a monocopy reference gene in the  
154 host (*RP49* in *Drosophila melanogaster*) and primers targeting a monocopy gene outside of the Octomom region in  
155 *Wolbachia* (*WD0505* in wMelPop). Then, we normalized the number of copies of *WD0505* by the number of copies  
156 of the reference gene *RP49* to estimate the relative density of wMelPop per fly (Monnin *et al.*, 2020). To quantify  
157 the average Octomom copy number of the wMelPop population within a fly, we used primers targeting the same  
158 gene located outside the Octomom copy number in the wMelPop genome (*WD0505*) and primers targeting a gene  
159 inside the Octomom region (*WD0513*). Then, we normalized the number of copies of *WD0513* by the number of  
160 copies of *WD0505* to estimate the mean Octomom copy number of the wMelPop population per fly (Chrostek *et*  
161 *al.*, 2013). The sequences of the primers used (synthesis by Eurogentec) are available in the Table s1.

162 The PCR amplifications were performed on a CFX96 instrument (Bio-Rad), independently for each target gene. Four  
163  $\mu\text{L}$  of a diluted DNA sample (1/25), 0.5  $\mu\text{L}$  of each forward and reverse primer (100  $\mu\text{M}$ ) and 5  $\mu\text{L}$  of SsoADV Universal  
164 SYBR<sup>®</sup> Green Supermix (BioRad) were used, for a total volume of 10  $\mu\text{L}$ . The reaction conditions for amplification  
165 were 95 °C for 3 min of preincubation, followed by 40 cycles of {95 °C for 10 s for denaturation, 60 °C for 10 s for  
166 hybridization and 68 °C for 15 s for elongation}. The mean primer efficiencies were calculated using 6 points (in  
167 duplicate) from a 10-fold dilution series ( $10^3$  to  $10^8$  copies) of previously purified PCR products (*Table s1*). The cycle  
168 quantification (Cq) values were estimated by the regression method, and the mean Cq value between technical  
169 duplicates was used for the determination of individual DNA quantities (deviation between duplicates below 0.5  
170 cycles).

## 171 **Statistical analyses**

172 We used the R software (version 3.6.3) for all analyses (R Core Team, 2020). Density and Octomom copy number  
173 ratios were estimated and normalized from the Cq values using the EasyqpcR package (Le Pape, 2012), based on  
174 the qBase algorithms published by Hellemans *et al.* (2007), taking into account the efficiency of primers. We first  
175 used a control sample from an aliquoted DNA extract (w1118 line infected by the *Wolbachia* wMelCS strain) as a  
176 calibrator, to check for inter-plate variability. This variability was found to be small enough to be disregarded. Using  
177 the EasyqpcR package, we determined the quantity of *WD0505* relative to *RP49* and of *WD0513* relative to  
178 *WD0505*. In addition, as the wMelCS genome contains only one copy of Octomom, we confirmed that the Octomom  
179 copy number measured was close to one and set its values to exactly 1. We used this transformation of the  
180 calibrator value as a standardization for all the samples.

181 The relative density data were analyzed by general linear models. Normality and homoscedasticity were checked  
182 graphically. The Octomom copy number data were analyzed with general linear models with gamma distribution,  
183 as the distribution of this factor did not fit to a normal distribution. We confirmed graphically that the gamma  
184 distribution used in the model fitted to the Octomom copy number data with the package fitdistrplus (Delignette-  
185 Muller and Dutang, 2015). The significance of the factors in these models were checked graphically with confidence  
186 intervals and considering p-values.

187 In the first experiment, we focused on the overall effect of the host genetic background on the relative density and  
188 Octomom copy number. The host genetic background of the lineages was thus set as the explanatory variable. We  
189 used the method of contrasts with p-values adjusted by Tukey method to obtain the pairwise differences between  
190 the lineages for both the relative density and the Octomom copy number, and created statistical groups with these  
191 estimated pairwise differences. The correlation between the relative density and the Octomom copy number was  
192 performed by a linear model with the Octomom copy number set as an explanatory variable.

193 In the second and third experiments, we focused on the differences between replicates. Then, the replicate label  
194 was set as the explanatory factor. The statistical analyses were performed independently for the Bolivia and USA  
195 host genetic backgrounds. We also used the method of contrasts with p-values adjusted by Tukey method to obtain  
196 the pairwise differences between the replicates for both the relative density and the Octomom copy number.  
197

## 198 Results

199 To characterize the determinisms at play in the regulation of bacterial density, we first investigated if host genetic  
200 background can have an active influence on density levels. As the Octomom region is also implied in density  
201 regulation, we additionally tested the influence of its amplification on density levels and the potential interaction  
202 between host and bacterial genotypes on density levels.

### 203 *Wolbachia* introgression within various *Drosophila melanogaster* lines is associated with contrasted 204 infection patterns

205 During a preliminary experiment, we checked the infection status of six *D. melanogaster* populations with  
206 contrasted genotypes, introgressed with the heterogeneous strain wMelPop originating from the same isoA3 line.  
207 When we quantified the relative *Wolbachia* density (Figure 2A) and the average copy number of the genomic region  
208 Octomom (Figure 2B) eight generations after the introgression protocol, we found contrasted infection patterns in  
209 the different *D. melanogaster* lines tested.

210 Both *Wolbachia* density and composition (*i.e.*, measured as the mean number of Octomom copies) are significantly  
211 influenced by the host genotype (Linear regression model; w1118 – MP; Population effect on relative density:  $P =$   
212  $2.33 \times 10^{-09}$ ; Population effect on Octomom copy number:  $P = 2.62 \times 10^{-15}$ ; see statistical details in Table s2).  
213 Introgressed lines thus differed between each other (see pairwise comparisons in Table s3)., with a maximum  
214 difference in bacterial density and mean Octomom copy number of respectively 8.3 and 5.8-fold between Bolivia  
215 and USA lines (Table s2).

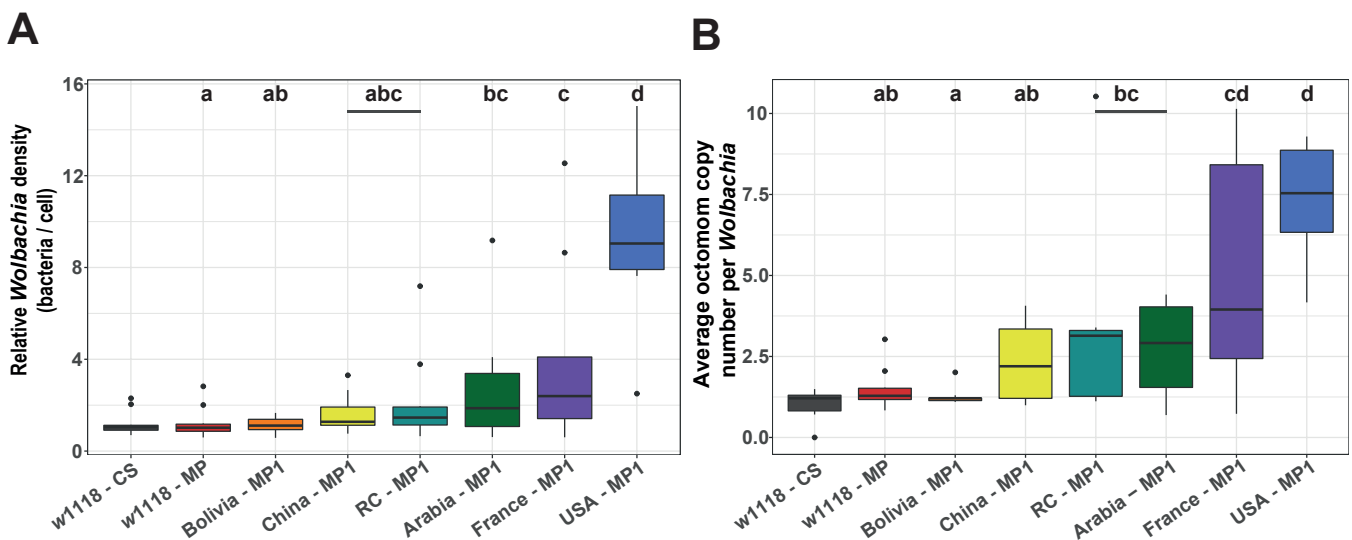

216  
217  
218  
219  
220  
221  
222  
223  
224  
225

**Figure 2: Effect of the host genetic background on infection patterns.**

**1A:** relative *Wolbachia* density per cell, **1B:** average Octomom copy number per *Wolbachia*). Each color represents a host genetic background ( $n = 10$  flies / background). Letters above boxplots show the significant groups performed by pairwise comparisons. The w1118-CS line is an experimental control infected with wMelCS and is not integrated in the statistical analyses. The w1118-MP line, infected with wMelPop, is the line initially used as 'donor' for the introgression procedure. All the other lines were infected with wMelPop by introgression (MP1).

226 We also observed a positive relationship between the relative density in wMelPop and the mean Octomom copy  
227 number per line ( $Intercept = -0.83$ ,  $SE(intercept) = 0.60$ ,  $slope = 1.23$ ,  $SE(slope) = 0.16$ ,  $r^2 = 0.89$ , Linear regression  
228 model on median of each host genetic background :  $P = 0.0003$ ) (Figure 3). This strong correlation suggests that the  
229 Octomom region is involved in the control of the bacterial density and confirms previous results highlighted by  
230 Chrostek et al. (2013) (Chrostek *et al.*, 2013). The number of repeats could thus provide a way to monitor the  
231 evolution of bacterial populations across generations and to better characterize selective pressures associated with  
232 the control of bacterial populations.

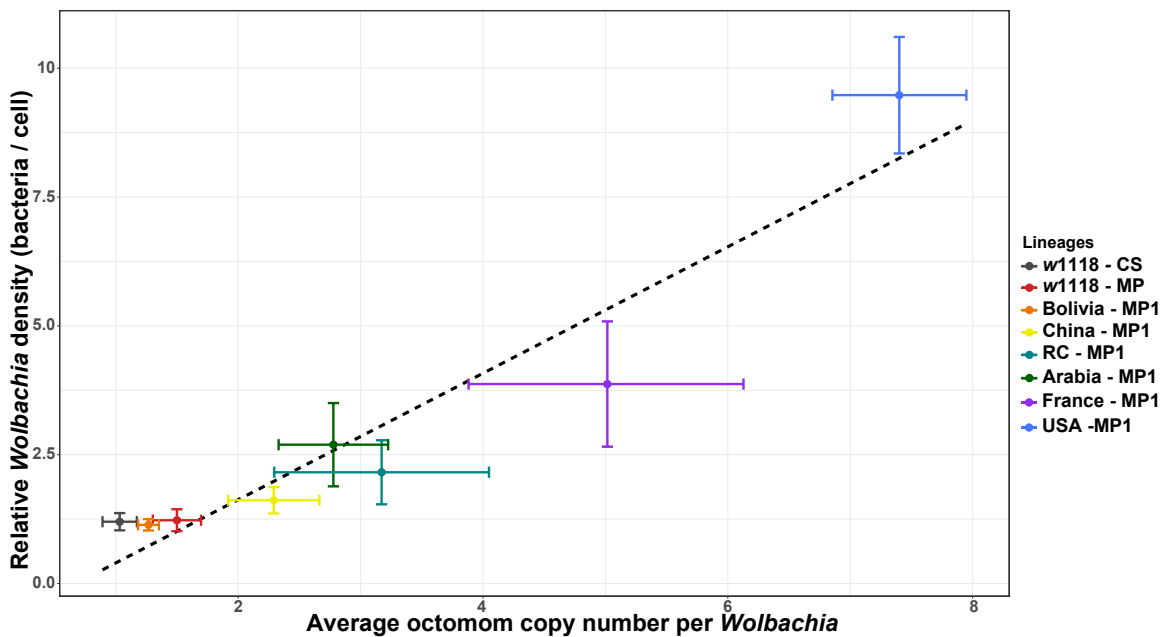

233  
234  
235  
236  
237  
238

**Figure 3: Relationship between the relative wMelPop density and the average Octomom copy number per *Wolbachia* cell.** Median  $\pm$  SE. Each color represents a host genetic background ( $n = 10$  flies / background), and the dashed line represents the linear regression.

239 In this preliminary experiment, we thus observed diversity in term of bacterial density and composition between  
240 the 6 lines of *Drosophila melanogaster* introgressed with wMelPop. These results suggest that different host genetic  
241 backgrounds selected specific variants of the symbiotic community. However, other factors, like genetic drift  
242 through a founder effect during the vertical transmission of symbionts from the donor line and / or from one host  
243 generation to the other, could also explain this pattern.

### 244 The infection pattern can change rapidly over generations, regardless of the host genetic background

245 To disentangle the effects of host genotype and genetic drift, we performed a similar experiment of introgression  
246 of the wMelPop *Wolbachia* strain in different genetic backgrounds, but established three independent replicate  
247 lines for each host genetic background. While the three replicates should exhibit the same response under host  
248 control, variation among the three replicates is expected under the drift hypothesis. This experiment was  
249 performed using the lines that exhibited the most extreme patterns of infection in the preliminary experiment (*i.e.*,  
250 Bolivia-MP1 and USA-MP1). We then evaluated the stability of the infection pattern over generations, by tracking  
251 the relative density (Figure 4A) and the Octomom copy number (Figure 4B) immediately after the first introgression  
252 event, after 13 generations, and after 25 generations (see Tables S4 & S5 for details).



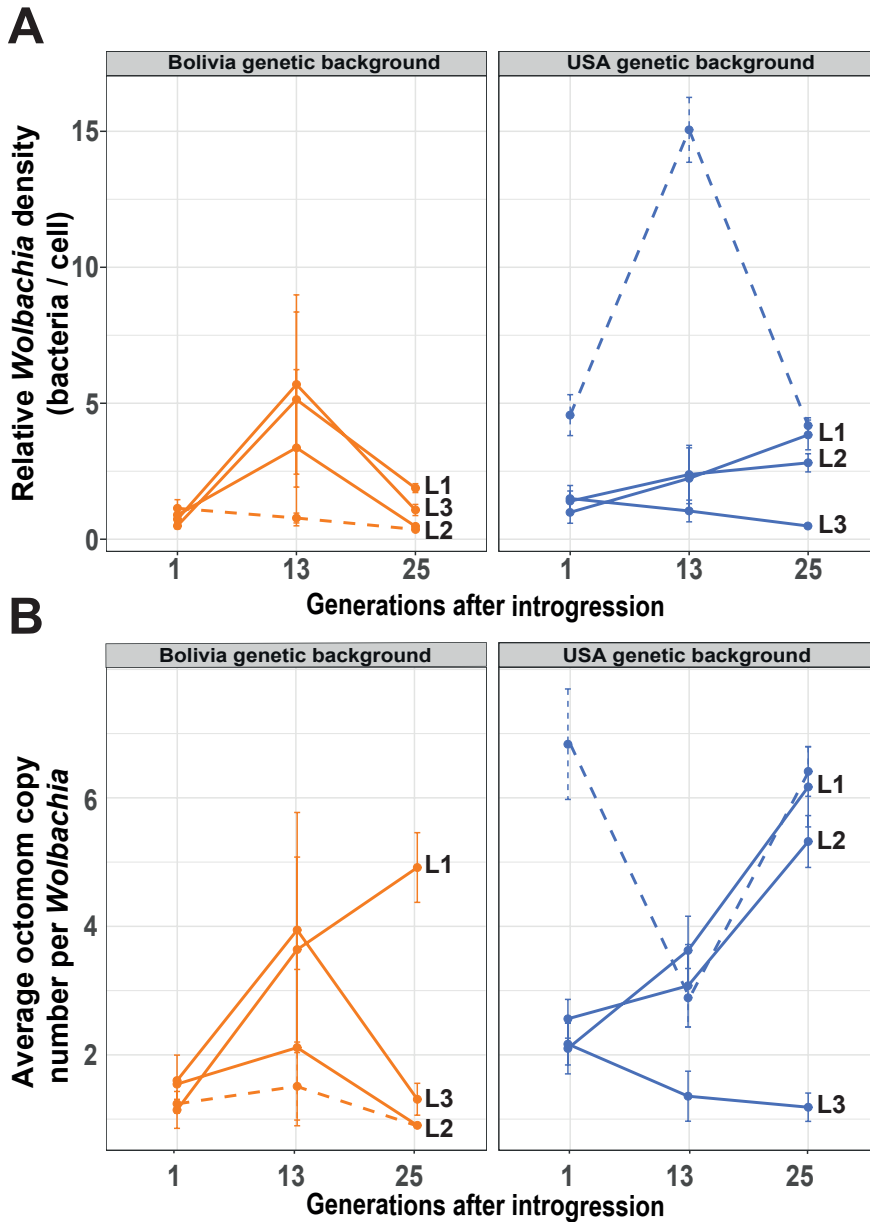

253  
254  
255  
256  
257  
258  
259  
260

**Figure 4: Replicability of the infection patterns over generations, after a new introgression procedure.**

**4A:** relative *Wolbachia* density, **4B:** average Octomom copy number per *Wolbachia*,  $n = 10$  / condition / timepoint, median  $\pm$  SE). Each color represents a host genetic background. Plain lines represent the replicate lineages from the new introgression procedure (MP2), dashed lines represent the lineages from the initial introgression procedure (MP1), which was set as reference in the statistical analyses. L1, L2 and L3 represent the replicate lines.

261 Just after the introgression event ( $t = 1$ ), the relative density and the average Octomom copy number per *Wolbachia*  
262 did not differ significantly between the Bolivia-MP2 replicates lines and the Bolivia-MP1 line from the first  
263 experiment used here as the reference (Linear regression model; experiment group effect on relative density :  $P >$   
264  $0.1$ ; experiment group effect on Octomom copy number:  $P > 0.1$ ; see statistical details in Table s4). The relative  
265 density and Octomom copy number of the Bolivia-MP2 replicates lines did not differ significantly between them  
266 (see pairwise comparisons in Table s5), which does not contradict a host determinism for density regulation trough  
267 Octomom copy number selection in this genetic background. However, at the same timepoint ( $t = 1$ ), the relative  
268 density and the average Octomom copy number in the USA-MP2 replicates lines differed significantly from the USA-  
269 MP1 line from the first experiment used here as the reference (Linear regression model; experiment group effect  
270 on relative density :  $P = 0.012$ ; experiment group effect on Octomom copy number:  $P = 7.6 \times 10^{-04}$ ; see statistical

271 details in Table s4). Nevertheless, the relative density and the average Octomom copy number of the USA-MP2  
272 replicates lines did not differ between them (see pairwise comparisons in Table s5), and did not show significant  
273 difference with the donor line (w1118-MP)(Linear regression model; maternal transmission effect on relative  
274 density:  $P = 0.38$ ; maternal transmission effect on Octomom copy number:  $P = 0.35$ ; Table s4). These results could  
275 suggest a maternal transmission effect from the donor line to the recipient ones, with infection patterns mirroring  
276 the bacterial composition of the donor line.

277 We then examined the stability of the infection pattern over generations, for each replicate line (Figure 4). After 25  
278 generations post introgression, the relative density and Octomom copy number per *Wolbachia* in Bolivia-MP2 and  
279 USA-MP2 replicate lines differed significantly from the quantities measured immediately after introgression (Linear  
280 regression model; generational effect on relative density:  $P_{Bolivia} = 0.011$ ,  $P_{USA} = 0.022$  ; generational effect on  
281 Octomom copy number:  $P_{Bolivia} = 0.044$ ,  $P_{USA} = 0.009$ ; see statistical details in Table s4). Moreover, the infection  
282 patterns between the Bolivia-MP2 or between the USA-MP2 replicate lines significantly differed (see pairwise  
283 comparisons in Table s5). All together, these results show an absence of host control on the density and  
284 composition of the bacterial population. The variations observed between replicate lines and over time may thus  
285 reflect drift.

## 286 **The bacterial composition initially transmitted strongly influences the patterns of infection observed** 287 **over generations**

288 In parallel with the second experiment, we performed reciprocal crosses to test the respective influence of the host  
289 genetic background, the bacterial population, the maternal effect of transmission, and drift on the wMelPop  
290 proliferation within flies (experiment #3). In order to jumble the host-*Wolbachia* associations, we made reciprocal  
291 crosses in 3 independent replicates with the Bolivia-MP1 line and USA-MP1 line from the first experiment. Then, to  
292 evaluate the stability of the infection pattern over generations, we measured the relative density of wMelPop  
293 (Figure 5A & 5B) and the average Octomom copy number per fly (Figure 5C & 5D) one generation after the final  
294 homogenizing cross, 13 generations and 25 generations post introgression (see Tables S6 & S7 for details).

295 Just after the introgression event ( $t = 1$ ), the relative density and the average Octomom copy number per *Wolbachia*  
296 differed significantly between the Bolivia(USA-MP1) replicate lines and the Bolivia-MP1 line (Linear regression  
297 model, experiment group effect on relative density:  $P = 0.016$ ; experiment group effect on Octomom copy number:  
298  $P = 4.19 \times 10^{-07}$ , see statistical details in Table s6), but not from the USA-MP1 line (Linear regression model,  
299 experiment group effect on relative density:  $P = 0.550$ ; experiment group effect on Octomom copy number:  $P =$   
300  $0.864$  , see statistical details in Table s6). In addition, the infection patterns of the Bolivia (USA-MP1) replicate lines  
301 did not differ significantly between them (see pairwise comparisons in Table s7). Similarly at the same timepoint,  
302 the relative density and the average Octomom copy number in the USA(Bolivia-MP1) replicate lines differed  
303 significantly from the USA-MP1 line (Linear regression model, experiment group effect on relative density  $P = 8.53$   
304  $\times 10^{-05}$ ; experiment group effect on Octomom copy number  $P = 2.20 \times 10^{-16}$ , see statistical details in Table s6) , but  
305 not from the Bolivia-MP1 line (Linear regression model, experiment group effect on relative density:  $P = 0.352$ ;  
306 experiment group effect on Octomom copy number:  $P = 0.789$ , see statistical details in Table s6). In addition, the

307 infection patterns of the USA(Bolivia-MP1) replicate lines did not differ significantly between them (see pairwise  
 308 comparisons in Table s7). These results confirm an absence of control from the host on the establishment of the  
 309 infection pattern and rather suggest a homogeneous symbiont transmission from the donor line.

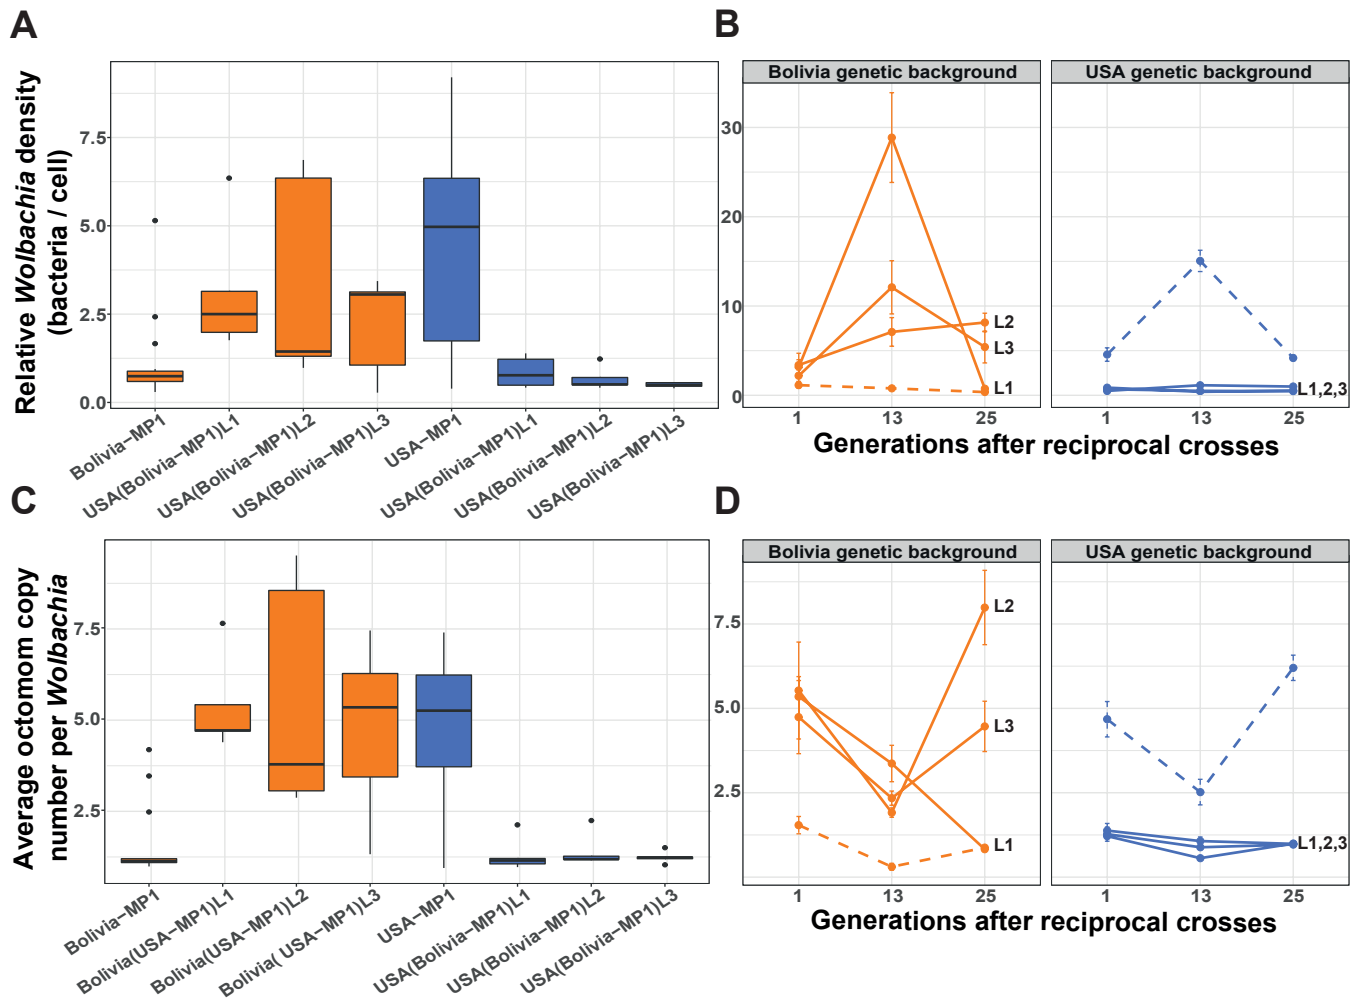

310  
 311  
 312  
 313  
 314  
 315  
 316  
 317  
 318  
 319  
 320  
 321  
 322  
 323  
 324  
 325  
 326  
 327  
 328  
 329

**Figure 5: Infection patterns in reciprocal crosses over generations.**

Relative density: **(5A)** one generation post introgression (box plot with ‘minimum’, 1<sup>st</sup> quartile, median, 3<sup>rd</sup> quartile, and ‘maximum’ ± outliers (dots)) and **(5B)** over generations (median ± SE). Average Octomom copy number per *Wolbachia*: **(5C)** one generation post introgression and **(5D)** over generations (median ± SE). Each color represents a host genetic background and the information in brackets represents the bacterial genetic background. Plain lines represent the replicate lineages from the reciprocal crosses, and dashed lines from the initial introgression procedure (MP1) that was used as reference in the statistical analyses. L1, L2 and L3 represent the replicate lines.

Then, we examined whether the infection patterns were stable within each of the replicate lines over generations by measuring the relative density and average Octomom copy number per *Wolbachia* 13 and 25 generations after the last backcross. After 25 generations post introgression, the relative density in Bolivia(USA-MP1) replicate lines differed significantly from their reference at t = 1 (Linear regression model, generational effect on the relative density:  $P = 0.006$  ; generational effect on the Octomom copy number:  $P = 7.79 \times 10^{-05}$ , see statistical details in Table s6). On the contrary, the USA(Bolivia-MP1) replicate lines did not differ from their reference at t = 1 (Linear regression model, generational effect on the relative density:  $P = 0.060$  ; generational effect on the Octomom copy number:  $P = 0.060$  , see statistical details in Table s6). Moreover, the infection pattern of the Bolivia (USA-MP1) replicate lines differed significantly between them, as well as the USA(Bolivia-MP1) did (see pairwise comparisons

330 in Table s7). All together, these results confirm an absence of host control on the density and composition of the  
331 bacterial population. Moreover, the variability observed between the replicates indicates a random transmission  
332 of the symbiont over generations.

333 In conclusion, we failed to reveal any influence of the host genotype on the control of the wMelPop proliferation  
334 through the selection of bacteria containing high or low Octomom copy number. Instead, we found a strong  
335 maternal effect of transmission and an instability of the infection patterns over generations. These experiments  
336 lead us to consider that drift could be an important evolutionary force responsible for the diversification of infection  
337 patterns observed.

## 338 **Discussion**

339 In this study we sought to identify the determinisms involved in the regulation of endosymbiotic populations and  
340 used the *Drosophila melanogaster* – wMelPop symbiotic system to track the influence of host and symbiont  
341 genotypes on the density regulation, as well as the evolutionary forces at play. Indeed, this symbiotic model is  
342 particularly relevant because it exhibits genetic variability among the vertically transmitted symbiont population,  
343 whose evolution can be tracked by a genomic amplification (Octomom). While we first found large differences  
344 when comparing infection patterns (*i.e.*, bacterial density and Octomom copy number) in different host genetic  
345 backgrounds, such host control on bacterial proliferation/selection was not confirmed after new experiments of  
346 introgression on more replicate lines and crossing experiments between lines exhibiting the most extreme infection  
347 patterns. Instead, we showed that the infection patterns were initially set up by the bacterial genotype and became  
348 very unstable over generations. These results suggest that, in this symbiotic system, drift strongly influences the  
349 evolution of the symbiont density -and thus its stability over generations-, contrarily to what is generally described  
350 in the literature of insect endosymbioses (*e.g.*, Mouton *et al.*, 2003; Hosokawa *et al.*, 2006).

351 Numerous examples in insects support an active regulation of symbiotic populations by the host, with stable density  
352 over generations when the environment remains constant (Ikeda, Ishikawa and Sasaki, 2003; Mouton *et al.*, 2004,  
353 2007; Funkhouser-Jones *et al.*, 2018). The orchestrated modulation of the symbiont proliferation rate throughout  
354 insect development also suggests a fine-tuned host control of the bacterial density (Rio *et al.*, 2006; Login *et al.*,  
355 2011; Vigneron *et al.*, 2012; Duarte *et al.*, 2020). On the opposite, bacterial factors alone can also explain variation  
356 in bacterial densities within some hosts. For example, different strains of *Wolbachia* are known to exhibit different,  
357 but stable, density levels in the same host lines based on their genetic particularities (Mouton *et al.*, 2003; Chrostek  
358 *et al.*, 2013). Proliferation of symbionts within the host is under strong selection as it is a key factor influencing the  
359 trade-off between symbiont transmission (*i.e.*, the highest is the symbiont density, the highest is the probability of  
360 transmission) and virulence (*i.e.*, the highest is the symbiont density, the highest are the cost on host survival and  
361 fecundity) (Anderson and May, 1982; Ewald, 1983). This transmission/virulence trade-off often leads to an optimal  
362 density, which can be controlled by host or bacterial determinants. In insect hosts, the main molecular mechanisms  
363 that determine the abundance and composition of symbionts are associated with immune response (Lemaitre and  
364 Hoffmann, 2007; Zug and Hammerstein, 2015) or resource allocation (Kiers *et al.*, 2003), and microbial

365 communities can in turn select resistance mechanisms against host effectors or trigger antagonist regulators of the  
366 host immunity (Vallet-Gely *et al.*, 2008; Lindsey, 2020).

367 In the *D. melanogaster*-wMelPop system, however, we observed a strong instability of infection patterns that could  
368 be due either to an instability of the optimum, or to a large influence of drift that limits the ability of the system to  
369 reach the optimum. Our results, and notably the variations observed between replicate lines in controlled  
370 conditions, rather suggest a strong influence of drift on the regulation of bacterial density. Bacterial factors, such  
371 as the number of Octomom copy, could fluctuate through time and be at the origin of variation in density levels.  
372 However, the Octomom genomic region has recently been questioned regarding its involvement in the  
373 establishment of density levels. Historically, wMelPop proliferation rate and virulence have been shown to be  
374 correlated to the genomic amplification of the Octomom region (Chrostek *et al.*, 2013; Chrostek and Teixeira, 2015,  
375 2018), but this relationship has been challenged by Rohrscheib *et al.* (Rohrscheib *et al.*, 2016, 2017), who support  
376 that the virulence of wMelPop rather depends on an increase in the extrinsic rearing temperature. However, to  
377 exclude any influence of the Octomom copy number on *Wolbachia* growth and pathogenicity, these variables  
378 should be tested independently of the temperature (Chrostek and Teixeira, 2017). At constant temperature, our  
379 results show a clear link between the density in adults and the number of copies of Octomom, and are in accordance  
380 with the current literature (Chrostek *et al.*, 2013; Chrostek and Teixeira, 2015, 2018; Monnin *et al.*, 2020).  
381 Consequently, this genomic amplification can be used as a marker of bacterial diversity and evolution of our model  
382 system.

383 We can thus wonder why we observed such variability and temporal instability within lineages, and why drift  
384 overcomes this potential bacterial regulation through Octomom? Indeed, this pattern contrasts with what is  
385 observed in already well-established symbioses, where one symbiont genotype is fixed (Werren, Baldo and Clark,  
386 2008). In our experiments, we were able to show very similar levels of infection between mothers and daughters  
387 just after introgression or reciprocal crosses procedures, suggesting a maternal effect. However, instability  
388 observed across generations suggests that this effect is probably non-genetic: when a large number of bacteria is  
389 observed in the mother's tissues, a large number of bacteria is transmitted to the oocytes and maintained in the  
390 adult stage (Veneti *et al.*, 2004; Hosokawa, Kikuchi and Fukatsu, 2007; Parkinson, Gobin and Hughes, 2016).  
391 However, there may still be random variability between mothers regarding the amount of bacteria transmitted to  
392 their eggs, and between these eggs (Mira and Moran, 2002). Bottlenecks during transmission can thus eventually  
393 lead to a gradual shift of the 'initial' density over time. Bottlenecks can also influence density levels through random  
394 differential transmission of bacterial variants from one generation to the next (Funk, Wernegreen and Moran, 2001;  
395 Kaltenpoth *et al.*, 2010), especially if these variants exhibit different reproductive rates (as it is the case with variants  
396 carrying different numbers of Octomom copies (Duarte *et al.*, 2020)). To summarize, if not counteracted by host or  
397 symbiont density control, drift is expected to induce instability over generations by a combination of quantitative  
398 (*i.e.*, transmission of a non-equivalent number of bacteria to the eggs) and qualitative/genetic (*i.e.*, random  
399 transmission of different variants) bottlenecks. Hence, the high variability and the temporal instability depicted in  
400 our study could reflect the random transmission of different wMelPop quantities and variants during transmission  
401 bottlenecks. Interestingly, we observed a higher temporal instability when the inter-individual variability was higher

402 in the donor lines; variability which was associated with higher values of density and Octomom copy numbers.  
403 Indeed, the higher were the density and number of Octomom copies of the transmitted symbionts in the lines, the  
404 more unpredictable was the outcome of infection patterns after several generations in these lines. As observed  
405 with microsatellites, the mutation rate of a repeated sequence depends strongly on the number of motifs present  
406 in the sequence (Whittaker *et al.*, 2003). Assuming the same rules on the number of Octomom copies present in  
407 the population (*i.e.*, a higher propensity for duplication when the number of copies is high), the outcomes of drift  
408 could be more unpredictable for individuals harboring the highest average number of Octomom copies. Indeed, in  
409 the presence of moderate bottlenecks and a mutation rate increasing with the number of copies, a strong variability  
410 of infection patterns is expected over generations. Finally, we cannot exclude any drift at the level of the host  
411 population, as we selected around 80 flies to establish the next generation (from ~200 eggs laid). However, previous  
412 experiments using a similar number of founding flies demonstrated stability in bacterial densities and Octomom  
413 copy numbers (Monnin *et al.*, 2020), suggesting that drift at the population level is negligible compared to  
414 transmission drift.

415 The presence of Octomom may be at the origin of a strong genetic instability of this strain, which, associated with  
416 drift, may counteract any fixation of a particular genotype, and generate instability of infection patterns as well as  
417 a variation in virulence. Even higher instability is expected to occur with lines carrying a high number of Octomom  
418 copies, because of the increased mutation rate. Under these conditions, between-host selection should therefore  
419 not be efficient, and would explain why the vertically transmitted *wMelPop* strain exhibits a strong virulence,  
420 whereas the overall alignment of interests between the host and vertically transmitted symbionts generally leads  
421 to the selection of low virulent symbionts that maximize host survival and indirectly their own transmission  
422 (Anderson and May, 1982; O'Neill, Hoffmann and Werren, 1997). Maintenance of this virulence phenotype has also  
423 been associated with the fact that virulence is only expressed in conditions rarely observed in nature, so that the  
424 between-host selection against highly prolific variants (such as those with high Octomom copy numbers) is weak  
425 at 25°C. A recent study however shows that strains with 8-9 Octomom copies are pathogenic from 18°C to 29°C  
426 (Duarte *et al.*, 2020). In addition, another selective force, the within-host selection, could explain the virulence of  
427 *wMelPop* in certain environmental conditions. Indeed, when fly populations are reared at 28°C, Monnin *et al.*  
428 (2020) showed that the population evolved toward a higher virulence, which may be due to the stronger effect of  
429 within-host selection compared to between-host selection. Thus, when selective pressures are strong, within and  
430 between-host selection could modulate symbiont virulence in the *Drosophila-wMelPop* association, whereas drift  
431 might not allow any co-evolution between partners and co-adaptation to environmental changes when selective  
432 pressures are limited.

433 To conclude, we showed that the host did not control for bacterial density and composition in the symbiosis  
434 between *D. melanogaster* and *wMelPop*, and that the infection patterns were very instable across generations,  
435 suggesting a strong influence of drift that could limit the effects of within- and between-host selections. As the  
436 transmission of symbionts in vertically-transmitted symbiosis is subject to potential bottlenecks both in terms of  
437 quantity and genetic diversity (Mira and Moran, 2002; Galbreath *et al.*, 2009; Kaltenpoth *et al.*, 2010), it seems  
438 necessary to further characterize the intensity of bottlenecks in this symbiotic system, in order to better evaluate

439 the impact of drift on the evolution of bacterial populations in vertically-transmitted symbiosis and its impact on  
440 host phenotypes.

441

## 442 **Acknowledgments**

443 We thank Nicole Lara and Claire Traversaz-Erchoff for providing the *Drosophila* media. We also thank the DTAMB  
444 platform for providing us technical resources for molecular biology experiments. This work was supported by the  
445 Agence Nationale de la Recherche 'RESIST' program (ANR-16-CE02-0013-01) and performed within the framework  
446 of the LABEX ECOFECT (ANR-11-LABX-0048) and the SBP Micro-Be-Have of Université de Lyon, within the  
447 programme 'Investissements d'Avenir' (ANR-11-IDEX-0007 ; ANR-16-IDEX-0005).

## 448 **Conflict of interest disclosure**

449 The authors of this preprint declare that they have no financial conflict of interest with the content of this article.  
450 NK & FV are recommenders for PCI Evolutionary Biology.

## 451 **Data accessibility & Supplementary material**

452 Raw data and scripts are available online: <https://doi.org/10.5281/zenodo.4288852> and  
453 <https://doi.org/10.5281/zenodo.4288890>, respectively.

454

## 455 **References**

- 456 Abbot, P. and Moran, N. A. (2002) 'Extremely low levels of genetic polymorphism in endosymbionts (*Buchnera*) of  
457 aphids (Pemphigus)', *Molecular Ecology*, 11(12), pp. 2649–2660. doi: 10.1046/j.1365-294X.2002.01646.x.
- 458 Alizon, S. *et al.* (2009) 'Virulence evolution and the trade-off hypothesis: History, current state of affairs and the  
459 future', *Journal of Evolutionary Biology*, 22(2), pp. 245–259. doi: 10.1111/j.1420-9101.2008.01658.x.
- 460 Alizon, S., de Roode, J. C. and Michalakis, Y. (2013) 'Multiple infections and the evolution of virulence', *Ecology*  
461 *Letters*, 16(4), pp. 556–567. doi: 10.1111/ele.12076.
- 462 Anderson, R. M. and May, R. M. (1982) 'Coevolution of hosts and parasites', *Parasitology*. Cambridge University  
463 Press, 85(2), pp. 411–426. doi: 10.1017/S0031182000055360.
- 464 Asnicar, F. *et al.* (2017) 'Studying Vertical Microbiome Transmission from Mothers to Infants by Strain-Level  
465 Metagenomic Profiling', *mSystems*, 2(1), pp. e00164-16. doi: 10.1128/mSystems.00164-16.
- 466 Banks, J. A. and Birky, C. W. (1985) 'Chloroplast DNA diversity is low in a wild plant, *Lupinus texensis*.', *Proceedings*  
467 *of the National Academy of Sciences of the United States of America*, 82(20), pp. 6950–6954. doi: 10.1073/  
468 pnas.82.20.6950.
- 469 De Bary, A. (1879) '*Die Erscheinung der Symbiose*'. Vortrag auf der Versammlung der Naturforschung und Ärzte zu  
470 Cassel. Verlag von Karl J. Trübner Strassburg, 121, pp. 1–30.
- 471 Birky, C. W., Fuerst, P. and Maruyama, T. (1989) 'Organelle gene diversity under migration, mutation, and drift:  
472 Equilibrium expectations, approach to equilibrium, effects of heteroplasmic cells, and comparison to nuclear  
473 genes', *Genetics*, 121(3), pp. 613–627. doi: 10.1111/j.1365-2028.1973.tb00101.x.
- 474 Bustin, S. A. *et al.* (2009) 'The MIQE guidelines: Minimum information for publication of quantitative real-time PCR

- 475 experiments', *Clinical Chemistry*, 55(4), pp. 611–622. doi: 10.1373/clinchem.2008.112797.
- 476 Chrostek, E. *et al.* (2013) 'Wolbachia Variants Induce Differential Protection to Viruses in *Drosophila melanogaster*:  
477 A Phenotypic and Phylogenomic Analysis', *PLoS Genetics*, 9(12). doi: 10.1371/journal.pgen.1003896.
- 478 Chrostek, E. and Teixeira, L. (2015) 'Mutualism Breakdown by Amplification of *Wolbachia* Genes', *PLoS Biology*,  
479 13(2), pp. 1–23. doi: 10.1371/journal.pbio.1002065.
- 480 Chrostek, E. and Teixeira, L. (2017) 'Comment on Rohrscheib *et al.* 2016 'Intensity of mutualism breakdown is  
481 determined by temperature not amplification of *Wolbachia* genes', *PLoS Pathogens*, 13(9), pp. 2–7. doi:  
482 10.1371/journal.ppat.1006521.
- 483 Chrostek, E. and Teixeira, L. (2018) 'Within host selection for faster replicating bacterial symbionts', *PLoS ONE*,  
484 13(1), pp. 1–8. doi: 10.1371/journal.pone.0191530.
- 485 Delignette-Muller, M. L. and Dutang, C. (2015) '{fitdistrplus}: An {R} Package for Fitting Distributions', *Journal of*  
486 *Statistical Software*, 64(4), pp. 1–34. Available at: <http://www.jstatsoft.org/v64/i04/>.
- 487 Douglas, A. E. (1994) *Symbiotic interactions*. Oxon, GB: Oxford University Press, 1994.
- 488 Douglas, A. E. (2008) 'Conflict, cheats and the persistence of symbioses', *New Phytologist*, 177(4), pp. 849–858. doi:  
489 10.1111/j.1469-8137.2007.02326.x.
- 490 Douglas, A. E. (2014) 'The molecular basis of bacterial-insect symbiosis', *Journal of Molecular Biology*. Elsevier B.V.,  
491 426(23), pp. 3830–3837. doi: 10.1016/j.jmb.2014.04.005.
- 492 Douglas, A. E., Bouvaine, S. and Russell, R. R. (2011) 'How the insect immune system interacts with an obligate  
493 symbiotic bacterium', *Proceedings of the Royal Society B: Biological Sciences*, 278(1704), pp. 333–338. doi:  
494 10.1098/rspb.2010.1563.
- 495 Duarte, E. H. *et al.* (2020) 'Regulation of *Wolbachia* proliferation by the amplification and deletion of an addictive  
496 genomic island', *bioRxiv*. doi: 10.1101/2020.09.08.288217.
- 497 Ewald, P. W. (1983) 'Host-Parasite relations, vectors, and the evolution of disease severity', *Annual Review of*  
498 *Ecology, Evolution, and Systematics*, 14, pp. 465–485.
- 499 Funk, D. J., Wernegreen, J. J. and Moran, N. A. (2001) 'Intraspecific variation in symbiont genomes: bottlenecks and  
500 the aphid-*Buchnera* association', *Genetics*, 157(2), pp. 477–489.
- 501 Funkhouser-Jones *et al.* (2018) 'The maternal effect gene *Wds* controls *Wolbachia* titer in *Nasonia*', *Current Biology*,  
502 28(11), pp.1692-1702.e6. doi:10.1016/j.cub.2018.04.010.
- 503 Galbreath, J. G. M. S. *et al.* (2009) 'Reduction in post-invasion genetic diversity in *Crangonyx pseudogracilis*  
504 (Amphipoda: Crustacea): A genetic bottleneck or the work of hitchhiking vertically transmitted microparasites?',  
505 *Biological Invasions*, 12(1), pp. 191–209. doi: 10.1007/s10530-009-9442-3.
- 506 Ha, E. M. *et al.* (2005) 'A direct role for dual oxidase in *Drosophila* gut immunity', *Science*, 310(5749), pp. 847–850.  
507 doi: 10.1126/science.1117311.
- 508 Hellems, J. *et al.* (2007) 'qBase relative quantification framework and software for management and automated  
509 analysis of real-time quantitative PCR data', *Genome Biology*, 8:R19. doi:10.1186/gb-2007-8-2-r19.
- 510 Hosokawa, T. *et al.* (2006). 'Strict Host-Symbiont cospeciation and reductive genome evolution in insect gut  
511 bacteria', *PLoS Biology*, 4(10), pp. e337. doi:10.1371/journal.pbio.0040337.
- 512 Hosokawa, T., Kikuchi, Y. and Fukatsu, T. (2007) 'How many symbionts are provided by mothers, acquired by  
513 offspring, and needed for successful vertical transmission in an obligate insect-bacterium mutualism?', *Molecular*  
514 *Ecology*, 16(24), pp. 5316–5325. doi: 10.1111/j.1365-294X.2007.03592.x.
- 515 Ijichi, N. *et al.* (2002) 'Internal Spatiotemporal Population Dynamics of Infection with Three *Wolbachia* Strains in  
516 the Adzuki Bean Beetle, *Callosobruchus chinensis* (Coleoptera: Bruchidae)', *American Society for Microbiology*,  
517 68(8), pp. 4074–4080. doi: 10.1128/AEM.68.8.4074.
- 518 Ikeda, T., Ishikawa, H. and Sasaki, T. (2003) 'Regulation of *Wolbachia* Density in the Mediterranean Flour Moth,



- 519 *Ephestia kuehniella*, and the Almond Moth, *Cadra cautella*', *Zoological Science*, 20(2), pp. 153–157. doi:  
520 10.2108/zsj.20.153.
- 521 Kaltenpoth, M. *et al.* (2010) 'Life cycle and population dynamics of a protective insect symbiont reveal severe  
522 bottlenecks during vertical transmission', *Evolutionary Ecology*, 24(2), pp. 463–477. doi: 10.1007/s10682-009-9319-  
523 z.
- 524 Kiers, E.T., Rousseau, R.A., West, S.A., Denison, R.F. (2003) 'Host sanctions and the legume-rhizobium mutualism',  
525 *Nature*, 425, pp. 78–81. doi:10.1038/nature01931.
- 526 Lemaitre, B. and Hoffmann, J. (2007) 'The Host Defense of *Drosophila melanogaster*', *Annual Review of*  
527 *Immunology*, 25, pp. 697–743. doi: 10.1146/annurev.immunol.25.022106.141615.
- 528 Le Pape, S. (2012) 'EasyqpcR : EasyqpcR for easy analysis of real-time PCR data at IRTOMIT-INSERM U1082'.  
529 Available at: <http://irtomit.labo.univ-poitiers.fr/>.
- 530 Lindsey, A.R.I. (2020) 'Sensing, signaling, and secretion: a review and analysis of systems for regulating host  
531 interaction in *Wolbachia*', *Genes* 11(7):813. doi: 10.3390/genes11070813.
- 532 Login, F. H. *et al.* (2011) 'Antimicrobial peptides keep insect endosymbionts under control', *Science*, 334(6054), pp.  
533 362–365. doi: 10.1126/science.1209728.
- 534 López-Madrugal, S., and Duarte, E. H. (2019) 'Titer regulation in arthropod-*Wolbachia* symbioses', *FEMS*  
535 *Microbiology Letters*, 366(23), fnz232. doi: 10.1093/femsle/fnz232
- 536 Mathé-Hubert, H. *et al.* (2019) 'Nonrandom associations of maternally transmitted symbionts in insects: The roles  
537 of drift versus biased cotransmission and selection', *Molecular Ecology*, 28(24), pp. 5330–5346. doi:  
538 10.1111/mec.15206.
- 539 Min, K. T. and Benzer, S. (1997) '*Wolbachia*, normally a symbiont of *Drosophila*, can be virulent, causing  
540 degeneration and early death.', *Proceedings of the National Academy of Sciences of the United States of America*,  
541 94(20), pp. 10792–10796. doi: 10.1073/pnas.94.20.10792.
- 542 Mira, A. and Moran, N. A. (2002) 'Estimating population size and transmission bottlenecks in maternally transmitted  
543 endosymbiotic bacteria', *Microbial Ecology*, 44(2), pp. 137–143. doi: 10.1007/s00248-002-0012-9.
- 544 Monnin, D. *et al.* (2020) 'Experimental evolution of virulence and associated traits in a *Drosophila melanogaster* –  
545 *Wolbachia* symbiosis', *bioRxiv*, 2020.04.26.062265, ver. 4 peer-reviewed and recommended by PCI Evol Biol. doi:  
546 <https://doi.org/10.1101/2020.04.26.062265>.
- 547 Mouton, L. *et al.* (2003) 'Strain-specific regulation of intracellular *Wolbachia* density in multiply infected insects',  
548 *Molecular Ecology*, 12(12), pp. 3459–3465. doi: 10.1046/j.1365-294X.2003.02015.x.
- 549 Mouton, L. *et al.* (2004) 'Virulence, multiple infections and regulation of symbiotic population in the *Wolbachia*-  
550 *Asobara tabida* symbiosis', *Genetics*, 168(1), pp. 181–189. doi: 10.1534/genetics.104.026716.
- 551 Mouton, L. *et al.* (2007) 'Interaction between host genotype and environmental conditions affects bacterial density  
552 in *Wolbachia* symbiosis', *Biology Letters*, 3(2), pp. 210–213. doi: 10.1098/rsbl.2006.0590.
- 553 O'Neill, S. L., Hoffmann, A. and Werren, J. (1997) *Influential passengers: inherited microorganisms and arthropod*  
554 *reproduction*. Oxford University Press.
- 555 Parkinson, J. F., Gobin, B. and Hughes, W. O. H. (2016) 'Heritability of symbiont density reveals distinct regulatory  
556 mechanisms in a tripartite symbiosis', *Ecology and Evolution*, 6(7), pp. 2053–2060. doi: 10.1002/ece3.2005.
- 557 Poinso, D. *et al.* (1998) '*Wolbachia* Transfer from *Drosophila melanogaster* into *D. simulans*: Host Effect and  
558 Cytoplasmic Incompatibility Relationships', *Genetics*, 150(1), pp. 227–237.
- 559 Rio, R. V. M. *et al.* (2006) 'Dynamics of multiple symbiont density regulation during host development: Tsetse fly  
560 and its microbial flora', *Proceedings of the Royal Society B: Biological Sciences*, 273(1588), pp. 805–814. doi:  
561 10.1098/rspb.2005.3399.
- 562 Rohrscheib, C. E. *et al.* (2016) 'Intensity of Mutualism Breakdown Is Determined by Temperature Not Amplification  
563 of *Wolbachia* Genes', *PLoS Pathogens*, 12(9), pp. 1–15. doi: 10.1371/journal.ppat.1005888.

- 564 Rohrscheib, C. E. *et al.* (2017) 'Response to: Comment on Rohrscheib et al. 2016 "Intensity of mutualism breakdown  
565 is determined by temperature not amplification of *Wolbachia* genes"', *PLoS Pathogens*, 13(9), pp. 2016–2018. doi:  
566 10.1371/journal.ppat.1006521.
- 567 Szathmáry, E. and Smith, J. M. (1995) 'The major evolutionary transitions', *Nature*, pp. 227–232. doi:  
568 10.1038/374227a0.
- 569 Tiivel, T. (1991) 'Cell Symbiosis, Adaptation, and Evolution: Insect-Bacteria Examples', in: *Symbiosis as a Source of*  
570 *Evolutionary Innovation: Speciation and Morphogenesis*. MIT Press, p. 170.
- 571 Tipton, L., Darcy, J. L. and Hynson, N. A. (2019) 'A developing symbiosis: Enabling cross-talk between ecologists and  
572 microbiome scientists', *Frontiers in Microbiology*, 10(292). doi: 10.3389/fmicb.2019.00292.
- 573 Vallet-Gely, I., Lemaitre, B., Boccard, F. (2008) 'Bacterial strategies to overcome insect defences', *Nature Reviews*  
574 *Immunology* 6, pp.302-313. doi: doi:10.1038/nrmicro1870.
- 575 Veneti, Z. *et al.* (2004) 'Heads or tails: Host-parasite interactions in the *Drosophila-Wolbachia* system', *Applied and*  
576 *Environmental Microbiology*, 70(9), pp. 5366–5372. doi: 10.1128/AEM.70.9.5366-5372.2004.
- 577 Vigneron, A. *et al.* (2012) 'Host gene response to endosymbiont and pathogen in the cereal weevil *Sitophilus*  
578 *oryzae*', *BMC Microbiology*, 12(SUPPL. 1), pp. 1–15. doi: 10.1186/1471-2180-12-S1-S14.
- 579 Wernegreen, J. J. (2013) 'Mutualism meltdown in insects: Bacteria constrain thermal adaptation', *Current Opinion*  
580 *in Microbiology*, 15(3), pp. 255–262. doi: 10.1016/j.mib.2012.02.001.
- 581 Werren, J.H., Baldo, L., and Clark, M.E. (2008) '*Wolbachia*: master manipulators of invertebrate biology', *Nature*  
582 *Reviews Microbiology*, 6 pp.741-751. doi:10.1038/nrmicro1969.
- 583 Whittaker, J. C. *et al.* (2003) 'Likelihood-based estimation of microsatellite mutation rates', *Genetics*, 164(2), pp.  
584 781–787.
- 585 You, H., Lee W. J., and Lee, W-J. (2014) 'Homeostasis between gut-associated microorganisms and the immune  
586 system in *Drosophila*', *Current Opinion in Immunology*, 30, pp.48-53. doi: 10.1016/j.coi.2014.06.006
- 587 Zug, R., and Hammerstein, P. (2015) '*Wolbachia* and the insect immune system: what reactive oxygen species can  
588 tell us about mechanisms of *Wolbachia*-host interactions'. *Frontiers in Microbiology*, 6:1201. doi:  
589 0.3389/fmicb.2015.01201.
- 590
- 591
