# Supplementary material for: Wolbachia load variation in Drosophila is more likely caused by drift than by host genetic factors
Source: bioRxiv or medRxiv preprint supplement (doi:10.1101/2020.11.29.402545), 2021-05-10
Supplement: Supplementary file [file media-1.pdf]

# **Wolbachia load variation in *Drosophila* is more likely caused by drift than by host genetic factors**

## **Supporting information**

Alexis Bénard <sup>1,\*</sup>, Hélène Henri <sup>1</sup>, Camille Noûs <sup>1,2</sup>, Fabrice Vavre <sup>1</sup>, Natacha Kremer <sup>1,\*</sup>

<sup>1</sup> Université de Lyon, Université Lyon 1, CNRS, VetAgroSup, Laboratoire de Biométrie et Biologie Evolutive, UMR 5558, F-69622 Villeurbanne, France.

<sup>2</sup> Laboratoire Cogitamus, France.

\* Corresponding author(s): [natacha.kremer@normalesup.org](mailto:natacha.kremer@normalesup.org), [alexis.benard@outlook.com](mailto:alexis.benard@outlook.com)

**Table s1: Characteristics of oligonucleotide primers** used for the quantification of *Wolbachia* relative density and average Octomom copy number by qPCR.

**Table s2: Statistics associated with linear regression models on data from experiment #1** (relative wMelPop density and average Octomom copy number).

**Table s3: Pairwise comparisons performed from linear regression outputs of the experiment #1** (relative wMelPop density and average Octomom copy number).

**Table s4: Statistics associated with linear regression models on data from experiment #2** (relative wMelPop density and average Octomom copy number).

**Table s5: Pairwise comparisons performed on the linear regression models from the second introgression experiment** (relative wMelPop density and average Octomom copy number).

**Table s6: Statistics associated with linear regression models on data from the reciprocal crosses experiment** (relative wMelPop density and average Octomom copy).

**Table s7: Pairwise comparisons performed on the linear regression models from the reciprocal crosses experiment** (relative wMelPop density and average Octomom copy).

**Figure s1: Relationship between the relative density and the average octomom copy number per *Wolbachia*** in replicate lines at each timepoint of experiment #1.

**Figure s2: Relationship between the relative density and the average octomom copy number per *Wolbachia*** in replicate lines at each timepoint of the new introgression experiment (exp. #2).

**Figure s3: Correlation between the relative density and the average octomom copy number per *Wolbachia*** within each replicate line of the new introgression experiment (exp. #2).

**Figure s4: Correlation between the relative density and the average octomom copy number per *Wolbachia*** in replicate lines at each timepoint of the 'reciprocal crosses' experiment (exp. #3).

**Figure s5: Correlation between the relative density and the average octomom copy number per *Wolbachia*** within each line of the 'reciprocal crosses' experiment (exp. #3).

**Table s1: Characteristics of oligonucleotide primers** used for the quantification of *Wolbachia* relative density and average Octomom copy number by qPCR. The amplification efficiency (mean  $\pm$  SE) was determined by in-run standard curves, using 2 duplicates of a 10-fold dilution series of purified PCR products from  $10^3$  to  $10^8$  copies.

| Gene      | Sequence                         | Efficiency       | References                    |
|-----------|----------------------------------|------------------|-------------------------------|
| RP49dd-R  | 5'-CGA-TCT-CGC-CGC-AGT-AAC-3'    | 96.7 % $\pm$ 0.6 | Steckel and Boutros, 2005     |
| RP49dd-F  | 5'-CTG-CCC-ACC-GGA-TTC-AAG-3'    |                  |                               |
| WD0505-qR | 5'-ACG-CGA-GCA-TCT-TCC-ATA-AG-3' | 94.6 % $\pm$ 0.7 | Chrostek <i>et al.</i> , 2013 |
| WD0505-qF | 5'-TGT-TCC-TGG-TGG-ATC-ATC-TG-3' |                  |                               |
| WD0513-qR | 5'-AGC-ATG-TCC-TCT-GTG-CCA-TC-3' | 93.3 % $\pm$ 0.9 | Chrostek <i>et al.</i> , 2013 |
| WD0513-qF | 5'-TTA-ACC-GGC-CAG-TCT-TAT-CG-3' |                  |                               |

Chrostek, E. *et al.* (2013) 'Wolbachia Variants Induce Differential Protection to Viruses in *Drosophila melanogaster*: A Phenotypic and Phylogenomic Analysis', *PLoS Genetics*, 9(12). doi: 10.1371/journal.pgen.1003896.

Steckel, M. and Boutros, M. (2005) 'Rapid Development of Real-Time RT-PCR Assays Using Universal ProbeLibrary: Applications for Dissecting Signaling Pathways by RNA Interference', *Biochemica*, 3, pp. 17–19.

**Table s2: Statistics associated with linear regression models on data from experiment #1** (relative wMelPop density and average Octomom copy number per *Wolbachia*).

| Lines       | Mean density | SEM density | Mean Octomom | SEM Octomom | P-value density | P-value Octomom |
|-------------|--------------|-------------|--------------|-------------|-----------------|-----------------|
| w1118-MP    | 1.23         | 0.21        | 1.50         | 0.20        | Reference       | Reference       |
| Arabia-MP1  | 2.69         | 0.81        | 2.78         | 0.45        | 0.047           | 0.047           |
| Bolivia-MP1 | 1.14         | 0.11        | 1.27         | 0.08        | 0.955           | 0.633           |
| RC-MP1      | 2.16         | 0.62        | 3.17         | 0.88        | 0.149           | 0.030           |
| China-MP1   | 1.62         | 0.26        | 2.29         | 0.37        | 0.325           | 0.169           |
| France-MP1  | 3.87         | 1.22        | 5.02         | 1.13        | 0.004           | < 0.001         |
| USA-MP1     | 9.48         | 1.13        | 7.40         | 0.54        | < 0.001         | < 0.001         |
| w1118-CS    | 1.20         | 0.17        | 1.03         | 0.14        | ND              | ND              |

**Table s3: Pairwise comparisons performed from linear regression outputs of the experiment #1.**

Summary information of the pairwise comparisons with p-values adjusted using the Tukey's method. Analyses from bacterial density (log-transformed data) and Octomom copy numbers (log-transformed data) respectively below and above the black diagonal.

|                   | w1118-MP | Arabia-MP1 | Bolivia-MP1 | RC-MP1  | China-MP1 | USA-MP1 | France-MP1 | Octomom Copy Number |
|-------------------|----------|------------|-------------|---------|-----------|---------|------------|---------------------|
| w1118-MP          |          | 0.147      | 0.993       | 0.340   | 0.589     | < 0.001 | < 0.001    |                     |
| Arabia-MP1        | 0.041    |            | 0.022       | 0.998   | 0.986     | 0.001   | 0.186      |                     |
| Bolivia-MP1       | 1.000    | 0.372      |             | 0.003   | 0.185     | < 0.001 | < 0.001    |                     |
| RC-MP1            | 0.767    | 0.997      | 0.733       |         | 0.834     | 0.009   | 0.491      |                     |
| China-MP1         | 0.954    | 0.943      | 0.940       | 0.999   |           | < 0.001 | 0.022      |                     |
| USA-MP1           | < 0.001  | < 0.001    | < 0.001     | < 0.001 | < 0.001   |         | 0.683      |                     |
| France-MP1        | 0.005    | 0.961      | 0.050       | 0.728   | 0.427     | 0.001   |            |                     |
| Bacterial density |          |            |             |         |           |         |            |                     |

**Table s4: Statistics associated with linear regression models on data from experiment #2 (relative wMelPop density and average Octomom copy number).**

| Replicate lines                        | Mean density | SEM density | Mean Octomom | SEM Octomom | P-value density | P-value Octomom | Generation |
|----------------------------------------|--------------|-------------|--------------|-------------|-----------------|-----------------|------------|
| w1118-MP                               | 1.01         | 0.14        | 1.72         | 0.23        |                 |                 | 1          |
| Bolivia-MP1                            | 1.51         | 0.29        | 1.07         | 0.02        | > 0.1           | > 0.1           | 1          |
| Bolivia-MP2-L1                         | 0.72         | 0.24        | 0.96         | 0.40        |                 |                 |            |
| Bolivia-MP2-L2                         | 0.80         | 0.63        | 0.90         | 0.63        |                 |                 |            |
| Bolivia-MP2-L3                         | 1.36         | 0.22        | 1.78         | 0.05        |                 |                 |            |
| w1118-MP vs Bolivia-MP2 lines          | ND           | ND          | ND           | ND          | 0.699           | 0.718           | 1          |
| Bolivia-MP1                            | 0.95         | 0.36        | 0.36         | 0.22        | > 0.1           | 0.022           | 13         |
| Bolivia-MP2-L1                         | 5.07         | 8.20        | 3.40         | 1.49        |                 |                 |            |
| Bolivia-MP2-L2                         | 1.07         | 7.32        | 0.93         | 1.23        |                 |                 |            |
| Bolivia-MP2-L3                         | 1.42         | 8.40        | 0.98         | 1.84        |                 |                 |            |
| Bolivia-MP1                            | 0.70         | 0.05        | 0.87         | 0.04        | < 0.001         | < 0.001         | 25         |
| Bolivia-MP2-L1                         | 3.49         | 0.42        | 4.49         | 0.66        |                 |                 |            |
| Bolivia-MP2-L2                         | 0.91         | 0.07        | 0.88         | 0.03        |                 |                 |            |
| Bolivia-MP2-L3                         | 2.75         | 0.52        | 0.90         | 0.23        |                 |                 |            |
| USA-MP1                                | 6.17         | 3.36        | 4.86         | 0.98        | 0.081           | 0.025           | 1          |
| USA-MP2-L1                             | 1.35         | 1.02        | 1.78         | 0.44        |                 |                 |            |
| USA-MP2-L2                             | 2.06         | 0.95        | 2.65         | 1.88        |                 |                 |            |
| USA-MP2-L3                             | 2.44         | 1.22        | 1.86         | 0.36        |                 |                 |            |
| w1118-MP vs USA-MP2 lines              | ND           | ND          | ND           | ND          | 0.015           | 0.345           | 1          |
| USA-MP1                                | 5.06         | 0.47        | 2.51         | 0.47        | > 0.1           | 0.005           | 13         |
| USA-MP2-L1                             | 1.95         | 2.86        | 2.99         | 0.51        |                 |                 |            |
| USA-MP2-L2                             | 3.18         | 2.73        | 2.86         | 0.65        |                 |                 |            |
| USA-MP2-L3                             | 1.04         | 0.40        | 1.30         | 0.33        |                 |                 |            |
| USA-MP1                                | 8.57         | 0.73        | 6.28         | 0.47        | < 0.001         | < 0.001         | 25         |
| USA-MP2-L1                             | 7.41         | 1.39        | 6.01         | 0.75        |                 |                 |            |
| USA-MP2-L2                             | 6.39         | 0.85        | 5.53         | 0.49        |                 |                 |            |
| USA-MP2-L3                             | 1.02         | 0.17        | 0.84         | 0.26        |                 |                 |            |
| Generation effect in Bolivia-MP2 lines | ND           | ND          | ND           | ND          | < 0.001         | < 0.001         | 1 vs. 25   |
| Generation effect in USA-MP2 lines     | ND           | ND          | ND           | ND          | < 0.001         | 0.005           | 1 vs. 25   |

**Table s5: Pairwise comparisons performed on the linear regression models from the second introgression experiment.**

Summary information of the pairwise comparison with adjusted P-values with Tukey's method (bacterial density and Octomom copy numbers respectively below and above the black diagonal).

| Generation 1      | Bolivia-MP2-L1 | Bolivia-MP2-L2 | Bolivia-MP2-L3 | USA-MP2-L1 | USA-MP2-L2 | USA-MP2-L3 |                     |
|-------------------|----------------|----------------|----------------|------------|------------|------------|---------------------|
| Bolivia-MP2-L1    |                | 0.699          | 0.626          | ND         | ND         | ND         | Octomom Copy Number |
| Bolivia-MP2-L2    | 0.513          |                | 0.999          | ND         | ND         | ND         |                     |
| Bolivia-MP2-L3    | 0.548          | 0.999          |                | ND         | ND         | ND         |                     |
| USA-MP2-L1        | ND             | ND             | ND             |            | 0.270      | 0.999      |                     |
| USA-MP2-L2        | ND             | ND             | ND             | 0.733      |            | 0.304      |                     |
| USA-MP2-L3        | ND             | ND             | ND             | 0.727      | 1.000      |            |                     |
| Bacterial density |                |                |                |            |            |            |                     |
| Generation 13     | Bolivia-MP2-L1 | Bolivia-MP2-L2 | Bolivia-MP2-L3 | USA-MP2-L1 | USA-MP2-L2 | USA-MP2-L3 |                     |
| Bolivia-MP2-L1    |                | 0.831          | 0.999          | ND         | ND         | ND         | Octomom Copy Number |
| Bolivia-MP2-L2    | 0.929          |                | 0.799          | ND         | ND         | ND         |                     |
| Bolivia-MP2-L3    | 0.999          | 0.908          |                | ND         | ND         | ND         |                     |
| USA-MP2-L1        | ND             | ND             | ND             |            | 0.921      | 0.013      |                     |
| USA-MP2-L2        | ND             | ND             | ND             | 0.996      |            | 0.044      |                     |
| USA-MP2-L3        | ND             | ND             | ND             | 0.510      | 0.390      |            |                     |
| Bacterial density |                |                |                |            |            |            |                     |
| Generation 25     | Bolivia-MP2-L1 | Bolivia-MP2-L2 | Bolivia-MP2-L3 | USA-MP2-L1 | USA-MP2-L2 | USA-MP2-L3 |                     |
| Bolivia-MP2-L1    |                | < 0.001        | < 0.001        | ND         | ND         | ND         | Octomom Copy Number |
| Bolivia-MP2-L2    | < 0.001        |                | 0.943          | ND         | ND         | ND         |                     |
| Bolivia-MP2-L3    | 0.011          | 0.003          |                | ND         | ND         | ND         |                     |
| USA-MP2-L1        | ND             | ND             | ND             |            | 0.806      | < 0.001    |                     |
| USA-MP2-L2        | ND             | ND             | ND             | 0.394      |            | < 0.001    |                     |
| USA-MP2-L3        | ND             | ND             | ND             | < 0.001    | < 0.001    |            |                     |
| Bacterial density |                |                |                |            |            |            |                     |

**Table s6: Statistics associated with linear regression models on data from the reciprocal crosses experiment (relative wMelPop density and average Octomom copy).**

| Replicate lines                             | Mean density | SEM density | Mean Octomom | SEM Octomom | P-value density | P-value Octomom | Generation |
|---------------------------------------------|--------------|-------------|--------------|-------------|-----------------|-----------------|------------|
| Bolivia-MP1                                 | 1.23         | 0.28        | 1.09         | 0.02        | 0.047           | < 0.001         | 1          |
| Bolivia(USA-MP1)L1                          | 5.39         | 1.79        | 5.34         | 0.74        |                 |                 |            |
| Bolivia(USA-MP1)L2                          | 5.80         | 2.83        | 5.53         | 1.80        |                 |                 |            |
| Bolivia(USA-MP1)L3                          | 3.75         | 1.37        | 4.74         | 1.36        |                 |                 |            |
| Bolivia-MP1                                 | 1.24         | 0.36        | 0.53         | 0.22        | < 0.001         | < 0.001         | 13         |
| Bolivia(USA-MP1)L1                          | 9.20         | 2.01        | 3.37         | 0.67        |                 |                 |            |
| Bolivia(USA-MP1)L2                          | 2.26         | 0.64        | 1.91         | 0.17        |                 |                 |            |
| Bolivia(USA-MP1)L3                          | 3.85         | 1.19        | 2.34         | 0.26        |                 |                 |            |
| Bolivia-MP1                                 | 0.73         | 0.04        | 0.87         | 0.04        | < 0.001         | < 0.001         | 25         |
| Bolivia(USA-MP1)L1                          | 1.51         | 0.14        | 0.83         | 0.08        |                 |                 |            |
| Bolivia(USA-MP1)L2                          | 16.58        | 2.64        | 7.99         | 1.38        |                 |                 |            |
| Bolivia(USA-MP1)L3                          | 10.99        | 4.54        | 4.47         | 0.93        |                 |                 |            |
| USA-MP1                                     | 6.46         | 3.09        | 3.79         | 1.08        | 0.018           | < 0.001         | 1          |
| USA(Bolivia-MP1)L1                          | 1.74         | 0.49        | 1.27         | 0.26        |                 |                 |            |
| USA(Bolivia-MP1)L2                          | 1.37         | 0.37        | 1.38         | 0.26        |                 |                 |            |
| USA(Bolivia-MP1)L3                          | 1.01         | 0.08        | 1.21         | 0.09        |                 |                 |            |
| USA-MP1                                     | 4.80         | 0.48        | 2.52         | 0.47        | < 0.001         | < 0.001         | 13         |
| USA(Bolivia-MP1)L1                          | 0.79         | 0.20        | 0.88         | 0.05        |                 |                 |            |
| USA(Bolivia-MP1)L2                          | 1.01         | 0.17        | 1.07         | 0.15        |                 |                 |            |
| USA(Bolivia-MP1)L3                          | 0.36         | 0.05        | 0.56         | 0.02        |                 |                 |            |
| USA-MP1                                     | 8.50         | 0.73        | 6.20         | 0.47        | < 0.001         | < 0.001         | 25         |
| USA(Bolivia-MP1)L1                          | 1.05         | 0.15        | 0.96         | 0.05        |                 |                 |            |
| USA(Bolivia-MP1)L2                          | 0.94         | 0.08        | 0.99         | 0.04        |                 |                 |            |
| USA(Bolivia-MP1)L3                          | 1.99         | 0.29        | 0.99         | 0.03        |                 |                 |            |
| Generation effect in Bolivia(USA-MP1) lines | ND           | ND          | ND           | ND          | 0.015           | < 0.001         | 1 vs. 25   |
| Generation effect in USA(Bolivia-MP1) lines | ND           | ND          | ND           | ND          | 0.052           | 0.059           | 1 vs. 25   |
| Bolivia(USA-MP1) lines vs USA-MP1           | ND           | ND          | ND           | ND          | 0.798           | 0.586           | 1          |
| USA(Bolivia-MP1)lines vs Bolivia-MP1        | ND           | ND          | ND           | ND          | 0.416           | 0.559           | 1          |

**Table s7: Pairwise comparisons performed on the linear regression models from the ‘reciprocal crosses’ experiment.**

Summary information of the pairwise comparison with adjusted P-values with Tukey’s method (bacterial density and Octomom copy numbers respectively below and above the black diagonal).

| Generation 1       | Bolivia(USA-MP1)L1 | Bolivia(USA-MP1)L2 | Bolivia(USA-MP1)L3 | USA(Bolivia-MP1)L1 | USA(Bolivia-MP1)L2 | USA(Bolivia-MP1)L3 |                     |
|--------------------|--------------------|--------------------|--------------------|--------------------|--------------------|--------------------|---------------------|
| Bolivia(USA-MP1)L1 |                    | 0.999              | 0.966              | ND                 | ND                 | ND                 | Octomom Copy Number |
| Bolivia(USA-MP1)L2 | 0.989              |                    | 0.933              | ND                 | ND                 | ND                 |                     |
| Bolivia(USA-MP1)L3 | 0.664              | 0.832              |                    | ND                 | ND                 | ND                 |                     |
| USA(Bolivia-MP1)L1 | ND                 | ND                 | ND                 |                    | 0.988              | 0.998              |                     |
| USA(Bolivia-MP1)L2 | ND                 | ND                 | ND                 | 0.962              |                    | 0.957              |                     |
| USA(Bolivia-MP1)L3 | ND                 | ND                 | ND                 | 0.744              | 0.949              |                    |                     |
| Bacterial density  |                    |                    |                    |                    |                    |                    |                     |
| Generation 13      | Bolivia(USA-MP1)L1 | Bolivia(USA-MP1)L2 | Bolivia(USA-MP1)L3 | USA(Bolivia-MP1)L1 | USA(Bolivia-MP1)L2 | USA(Bolivia-MP1)L3 |                     |
| Bolivia(USA-MP1)L1 |                    | 0.206              | 0.562              | ND                 | ND                 | ND                 | Octomom Copy Number |
| Bolivia(USA-MP1)L2 | 0.002              |                    | 0.882              | ND                 | ND                 | ND                 |                     |
| Bolivia(USA-MP1)L3 | 0.037              | 0.482              |                    | ND                 | ND                 | ND                 |                     |
| USA(Bolivia-MP1)L1 | ND                 | ND                 | ND                 |                    | 0.537              | 0.010              |                     |
| USA(Bolivia-MP1)L2 | ND                 | ND                 | ND                 | 0.535              |                    | < 0.001            |                     |
| USA(Bolivia-MP1)L3 | ND                 | ND                 | ND                 | 0.018              | 0.001              |                    |                     |
| Bacterial density  |                    |                    |                    |                    |                    |                    |                     |
| Generation 25      | Bolivia(USA-MP1)L1 | Bolivia(USA-MP1)L2 | Bolivia(USA-MP1)L3 | USA(Bolivia-MP1)L1 | USA(Bolivia-MP1)L2 | USA(Bolivia-MP1)L3 |                     |
| Bolivia(USA-MP1)L1 |                    | < 0.001            | < 0.001            | ND                 | ND                 | ND                 | Octomom Copy Number |
| Bolivia(USA-MP1)L2 | < 0.001            |                    | 0.006              | ND                 | ND                 | ND                 |                     |
| Bolivia(USA-MP1)L3 | < 0.001            | 0.145              |                    | ND                 | ND                 | ND                 |                     |
| USA(Bolivia-MP1)L1 | ND                 | ND                 | ND                 |                    | 0.981              | 0.956              |                     |
| USA(Bolivia-MP1)L2 | ND                 | ND                 | ND                 | 0.904              |                    | 0.999              |                     |
| USA(Bolivia-MP1)L3 | ND                 | ND                 | ND                 | 0.001              | < 0.001            |                    |                     |
| Bacterial density  |                    |                    |                    |                    |                    |                    |                     |

**Figure s1:** Relationship between the relative density and the average octomom copy number per *Wolbachia* in replicate lines at each timepoint of experiment #1.

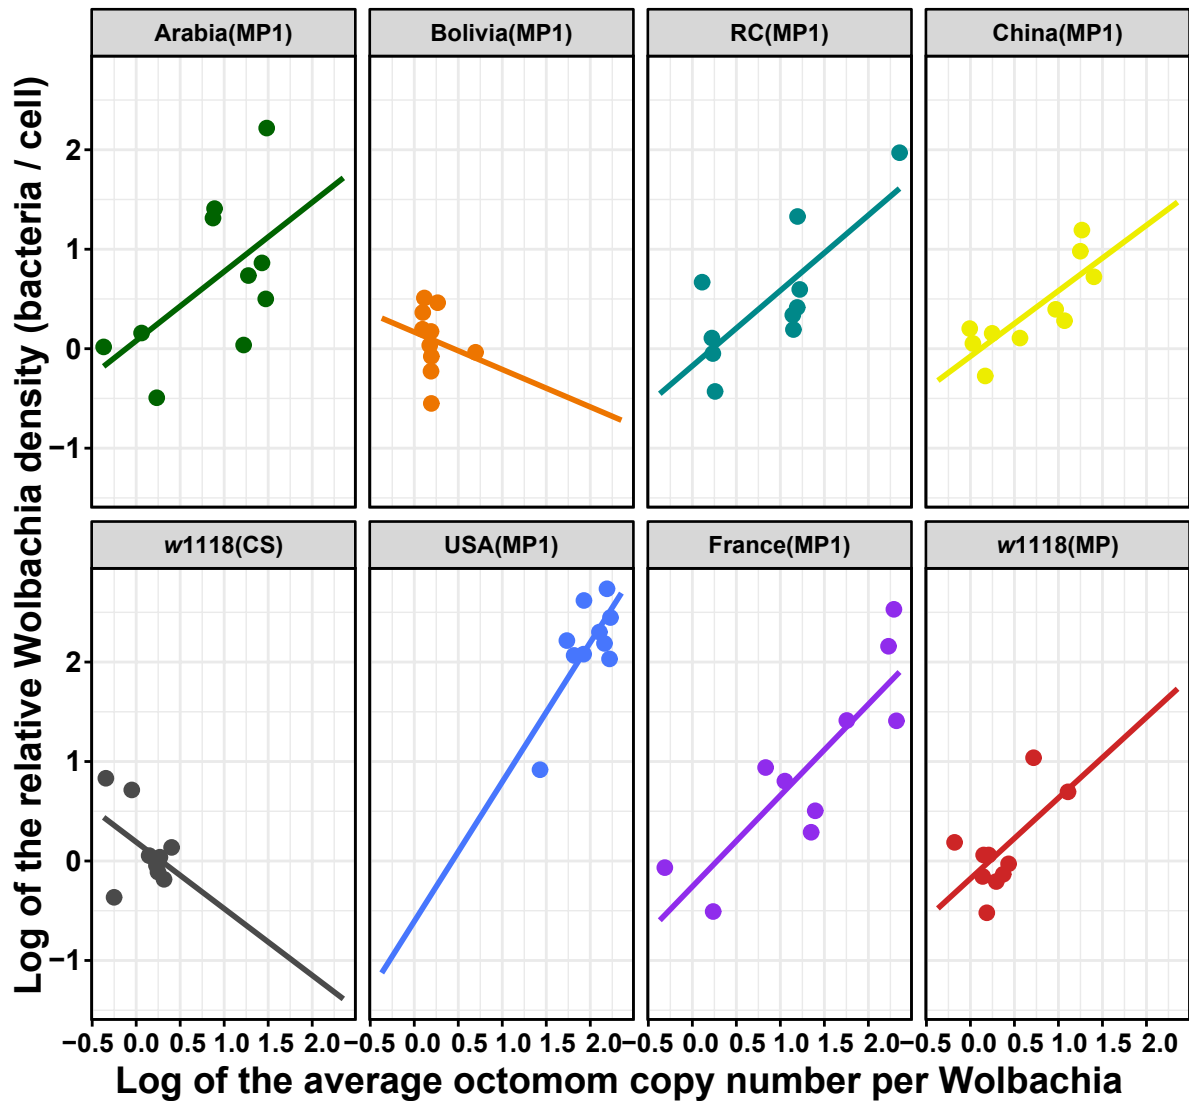

Arabia(MP1):  $0.696x + 0.079$ ;  $R^2 = 0.36$ ;  $P = 0.085$   
 Bolivia(MP1):  $-0.377x + 0.168$ ;  $R^2 = 0.04$ ;  $P = 0.5753$   
**RC(MP1):  $0.758x - 0.173$ ;  $R^2 = 0.59$ ;  $P = 0.009$**   
**China(MP1):  $0.659x - 0.077$ ;  $R^2 = 0.66$ ;  $P = 0.005$**   
 W1118(wMelCS):  $-0.670x - 0.191$ ;  $R^2 = 0.19$ ;  $P = 0.236$   
**USA(MP1):  $1.4022x - 0.607$ ;  $R^2 = 0.54$ ;  $P = 0.001$**   
**France(MP1):  $0.916x - 0.257$ ;  $R^2 = 0.73$ ;  $P = 0.002$**   
**W1118(MP):  $0.811x - 0.177$ ;  $R^2 = 0.40$ ;  $P = 0.049$**

**Figure s2:** Relationship between the relative density and the average octomom copy number per *Wolbachia* in replicate lines at each timepoint of the new introgression experiment (exp. #2).

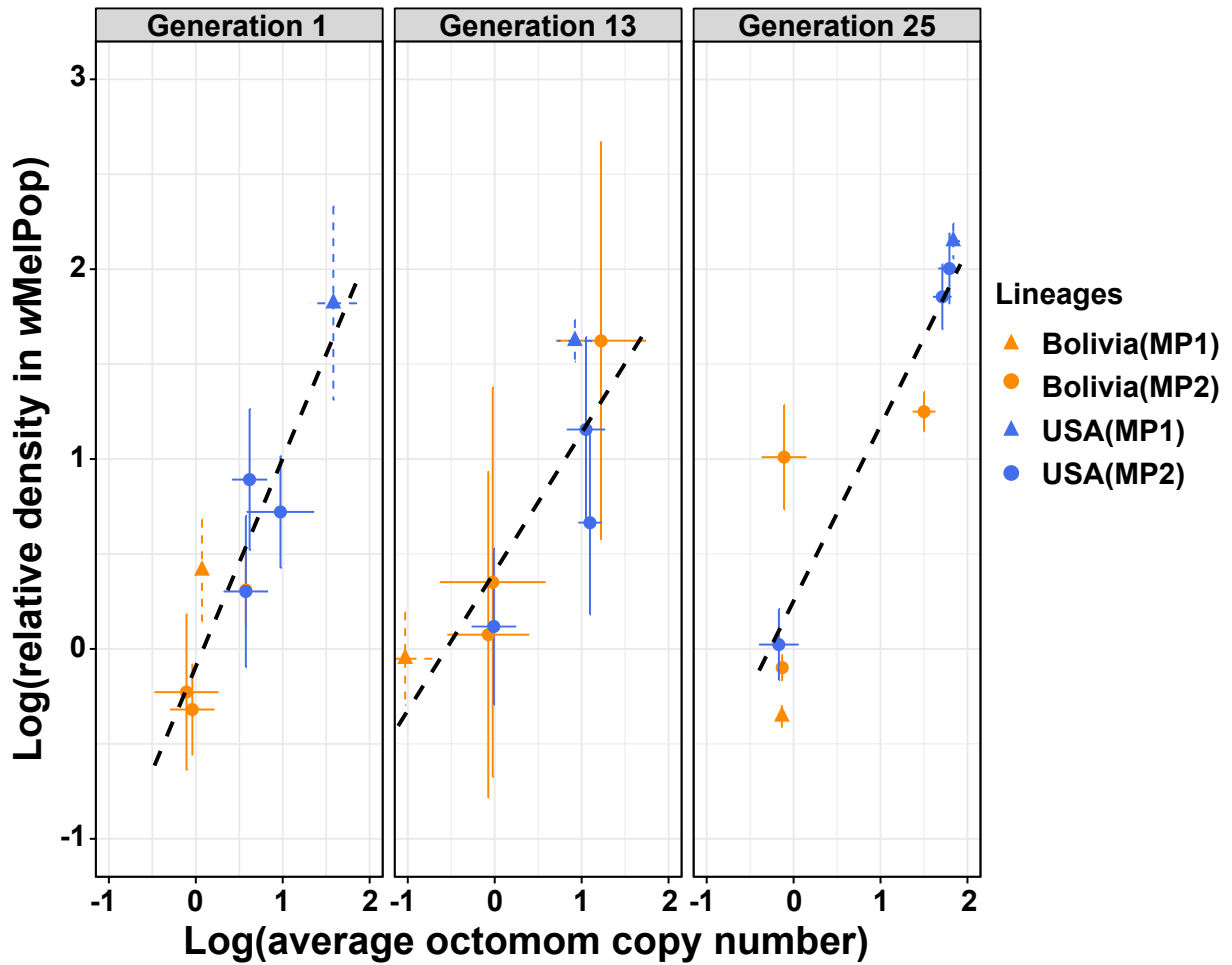

Generation #1:  $1.096x - 0.093$ ;  $R^2 = 0.84$ ;  $P = 0.001$

Generation #13:  $0.731x + 0.407$ ;  $R^2 = 0.72$ ;  $P = 0.008$

Generation #25:  $0.993x + 0.252$ ;  $R^2 = 0.83$ ;  $P = 0.002$



**Figure s3:** Correlation between the relative density and the average octomom copy number per *Wolbachia* within each replicate line of the new introgression experiment (exp. #2).

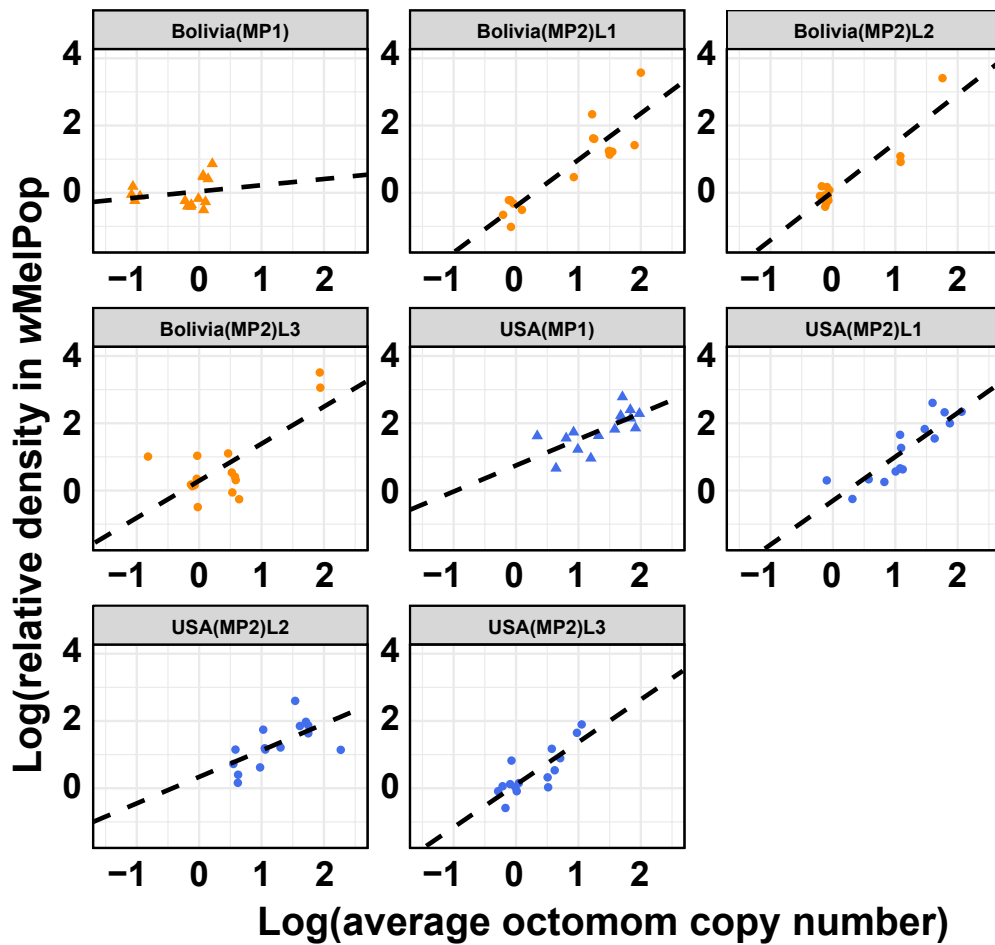

Bolivia(MP1):  $0.176x + 0.030$ ;  $R^2 = 0.044$ ;  $P = 0.455$   
 Bolivia(MP2)L1:  $1.390x - 0.392$ ;  $R^2 = 0.79$ ;  $P < 0.001$   
 Bolivia(MP2)L2:  $1.460x + 0.042$ ;  $R^2 = 0.86$ ;  $P < 0.001$   
 Bolivia(MP2)L3:  $1.098x + 0.296$ ;  $R^2 = 0.52$ ;  $P = 0.003$   
 USA(MP1):  $0.773x - 0.751$ ;  $R^2 = 0.50$ ;  $P = 0.003$   
 USA(MP2)L1:  $1.312x - 0.317$ ;  $R^2 = 0.75$ ;  $P < 0.001$   
 USA(MP2)L2:  $0.796x + 0.317$ ;  $R^2 = 0.41$ ;  $P = 0.011$   
 USA(MP2)L3:  $1.260x + 0.112$ ;  $R^2 = 0.66$ ;  $P < 0.001$

**Figure s4:** Correlation between the relative density and the average octomom copy number per *Wolbachia* in replicate lines at each timepoint of the 'reciprocal crosses' experiment (exp. #3).

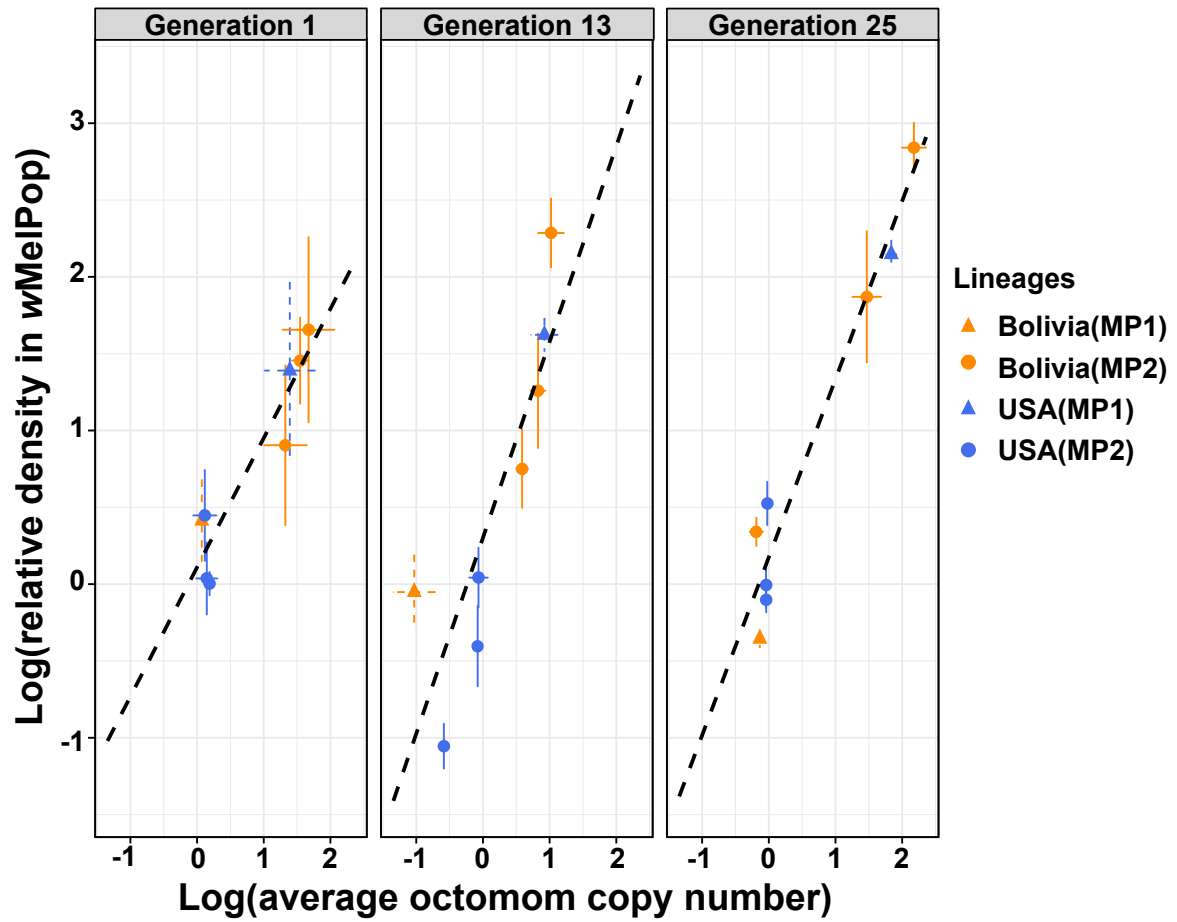

Generation #1:  $0.854x + 0.109$ ;  $R^2 = 0.88$   $P < 0.001$

Generation #13:  $1.275x + 0.302$ ;  $R^2 = 0.74$ ;  $P = 0.006$

Generation #25:  $1.83x - 0.763$ ;  $R^2 = 0.96$ ;  $P < 0.001$

**Figure s5:** Correlation between the relative density and the average octomom copy number per *Wolbachia* within each line of the 'reciprocal crosses' experiment (exp. #3).

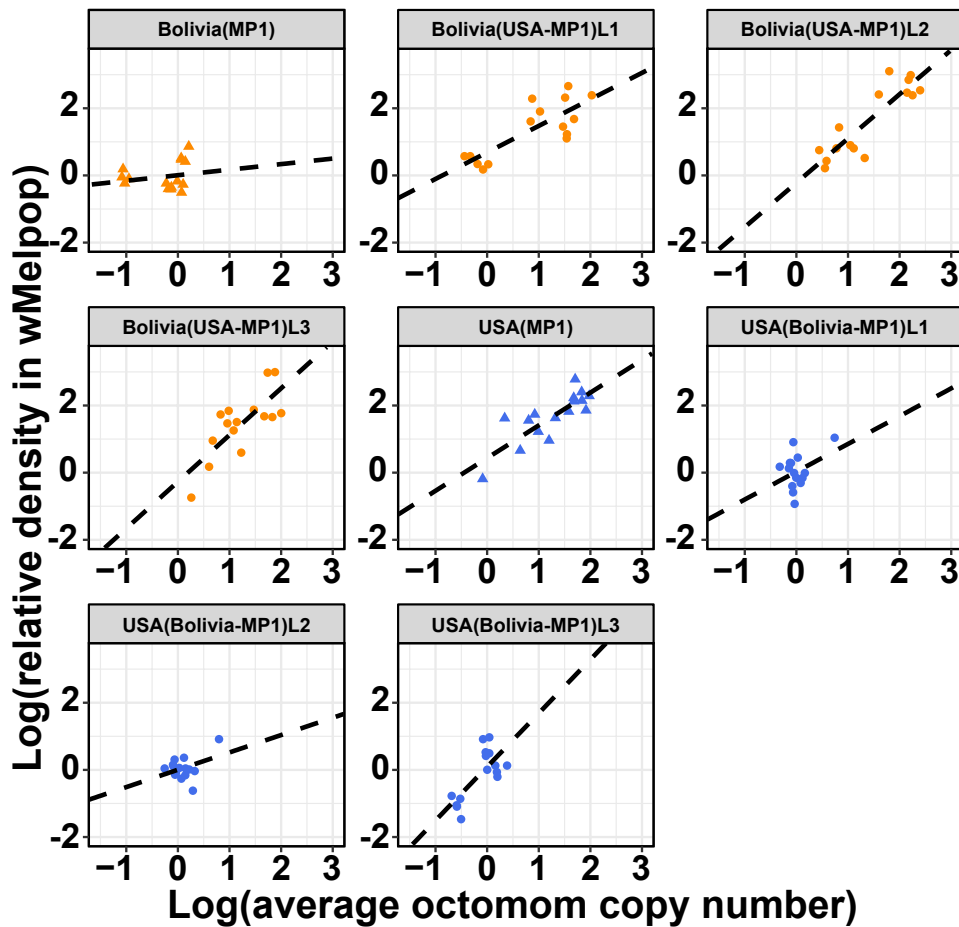

Bolivia(MP1):  $0.176x + 0.030$ ;  $R^2 = 0.04$ ;  $P = 0.455$   
 Bolivia(USA-MP1)L1:  $0.783 + 0.692x$ ;  $R^2 = 0.54$ ;  $P < 0.001$   
 Bolivia(USA-MP1)L2:  $1.319x - 0.229$ ;  $R^2 = 0.78$ ;  $P < 0.001$   
 Bolivia(USA-MP1)L3:  $1.400x - 0.025$ ;  $R^2 = 0.58$ ;  $P < 0.001$   
 USA(Bolivia-MP1):  $0.773x - 0.751$ ;  $R^2 = 0.50$ ;  $P = 0.003$   
 USA(Bolivia-MP1)L1:  $0.827x + 0.039$ ;  $R^2 = 0.14$ ;  $P = 0.173$   
 USA(Bolivia-MP1)L2:  $0.510x - 0.009$ ;  $R^2 = 0.14$ ;  $P = 0.167$   
 USA(Bolivia-MP1)L3:  $1.612x + 0.084$ ;  $R^2 = 0.54$ ;  $P = 0.002$
